# Supplementary material for: Exposure to low-dose ionising radiation from cardiac catheterisation and risk of cancer: the COCCINELLE study cohort profile
Source: PubMed Central journal article supplement — BMJ Open. 2021 Aug 3;11(8):e048576. doi: 10.1136/bmjopen-2020-048576 (PMC8336117; doi:10.1136/bmjopen-2020-048576), 2021-08-03
Supplement: bmjopen-2020-048576.draft_revisions.pdf [file bmjopen-2020-048576.draft_revisions.pdf]

# BMJ Open

BMJ Open is committed to open peer review. As part of this commitment we make the peer review history of every article we publish publicly available.

When an article is published we post the peer reviewers' comments and the authors' responses online. We also post the versions of the paper that were used during peer review. These are the versions that the peer review comments apply to.

The versions of the paper that follow are the versions that were submitted during the peer review process. They are not the versions of record or the final published versions. They should not be cited or distributed as the published version of this manuscript.

BMJ Open is an open access journal and the full, final, typeset and author-corrected version of record of the manuscript is available on our site with no access controls, subscription charges or pay-per-view fees (<http://bmjopen.bmj.com>).

If you have any questions on BMJ Open's open peer review process please email [info.bmjopen@bmj.com](mailto:info.bmjopen@bmj.com)

# BMJ Open

## Exposure to low-dose ionizing radiation from cardiac catheterization and risk of cancer: the COCCINELLE study cohort profile

|                               |                                                                                                                                                                                                                                                                                                                                                                                                                                                                                                                                                                                                                                                                                                                                                                                                                                                                                                                                                                                                                                                                                                                                                                                                                                                                                                                                                                                                                                                                                                                                                                                                                                                                                                                                                                                                                                                                                                                                                                                                                                                                                                                                                                                                                                                                                                                                                                                     |
|-------------------------------|-------------------------------------------------------------------------------------------------------------------------------------------------------------------------------------------------------------------------------------------------------------------------------------------------------------------------------------------------------------------------------------------------------------------------------------------------------------------------------------------------------------------------------------------------------------------------------------------------------------------------------------------------------------------------------------------------------------------------------------------------------------------------------------------------------------------------------------------------------------------------------------------------------------------------------------------------------------------------------------------------------------------------------------------------------------------------------------------------------------------------------------------------------------------------------------------------------------------------------------------------------------------------------------------------------------------------------------------------------------------------------------------------------------------------------------------------------------------------------------------------------------------------------------------------------------------------------------------------------------------------------------------------------------------------------------------------------------------------------------------------------------------------------------------------------------------------------------------------------------------------------------------------------------------------------------------------------------------------------------------------------------------------------------------------------------------------------------------------------------------------------------------------------------------------------------------------------------------------------------------------------------------------------------------------------------------------------------------------------------------------------------|
| Journal:                      | <i>BMJ Open</i>                                                                                                                                                                                                                                                                                                                                                                                                                                                                                                                                                                                                                                                                                                                                                                                                                                                                                                                                                                                                                                                                                                                                                                                                                                                                                                                                                                                                                                                                                                                                                                                                                                                                                                                                                                                                                                                                                                                                                                                                                                                                                                                                                                                                                                                                                                                                                                     |
| Manuscript ID                 | bmjopen-2020-048576                                                                                                                                                                                                                                                                                                                                                                                                                                                                                                                                                                                                                                                                                                                                                                                                                                                                                                                                                                                                                                                                                                                                                                                                                                                                                                                                                                                                                                                                                                                                                                                                                                                                                                                                                                                                                                                                                                                                                                                                                                                                                                                                                                                                                                                                                                                                                                 |
| Article Type:                 | Cohort profile                                                                                                                                                                                                                                                                                                                                                                                                                                                                                                                                                                                                                                                                                                                                                                                                                                                                                                                                                                                                                                                                                                                                                                                                                                                                                                                                                                                                                                                                                                                                                                                                                                                                                                                                                                                                                                                                                                                                                                                                                                                                                                                                                                                                                                                                                                                                                                      |
| Date Submitted by the Author: | 04-Jan-2021                                                                                                                                                                                                                                                                                                                                                                                                                                                                                                                                                                                                                                                                                                                                                                                                                                                                                                                                                                                                                                                                                                                                                                                                                                                                                                                                                                                                                                                                                                                                                                                                                                                                                                                                                                                                                                                                                                                                                                                                                                                                                                                                                                                                                                                                                                                                                                         |
| Complete List of Authors:     | <p>Abalo, Kossi Dovene; 1. Institute for Radiological Protection and Nuclear Safety (IRSN), PSE-SANTE/SESANE/Laboratory of Epidemiology, BP 17, 92262 Fontenay-aux-Roses, France</p> <p>Malekzadeh-Milani, Sophie; 2. M3C-Necker, Hôpital universitaire Necker-Enfants malades, Université de Paris, Paris, France</p> <p>Hascoët, Sébastien; M3C Marie-Lannelongue Hospital, National reference centre, Paediatric and Congenital Cardiac Surgery Department, Groupe Hospitalier Saint-Joseph, Paris Saclay University, Plessis-Robinson, France</p> <p>Dreuil, Serge; Institute for Radiological Protection and Nuclear Safety, (IRSN), PSE-SANTE/SER/UEM, BP 17, 92262 Fontenay-aux-Roses, France</p> <p>Feuillet, Tiphaine; AMAREXIA, 11 rue Claude Chahu, 75116 Paris, France</p> <p>Cohen, Sarah; M3C Marie-Lannelongue Hospital, National reference centre, Paediatric and Congenital Cardiac Surgery Department, Groupe Hospitalier Saint-Joseph, Paris Saclay University</p> <p>Dauphin, Claire; Hopital Gabriel Montpied, Cardiology and Vascular Department</p> <p>Di-Filippo, Sylvie; 6. Paediatric and Congenital Cardiology Department, Hôpital Femme-Mère-Enfant, Hospices Civils de Lyon, Université Claude Bernard Lyon 1, Lyon, France.</p> <p>Douchin, Stéphanie; Cardiopédiatrie, hôpital couple enfant, CHU Grenoble Alpes, 38043 Grenoble cedex 9, France</p> <p>Godart, François; Service de Cardiologie Infantile et Congénitale, Institut Cœur Poumon, 59037 Lille Cedex France</p> <p>Guérin, Patrice; Cardiopédiatrie, CHU Nantes (CHU Nantes, INSERM, Nantes Université, Clinique Cardiologique et des Maladies Vasculaires, CIC 1413, Institut du Thorax), Nantes, France.</p> <p>Helms, Pauline; Unit of Cardiopediatrics, University Hospital of Strasbourg, Strasbourg, France</p> <p>Karsenty, Clement; Pediatric and Congenital Cardiology, Children's Hospital and INSERM U1048, I2MC, Institut des Maladies Métaboliques et Cardiovasculaires, Université de Toulouse, France</p> <p>Lefort, Bruno; Institut des Cardiopathies Congénitales, CHRU Tours, 49 boulevard Béranger, 37000 Tours, France</p> <p>Mauran, Pierre; Unité de cardiologie pédiatrique et congénitale, American Memorial Hospital, CHU de Reims, 47 rue Cognacq-Jay, 51092 Reims Cedex, France</p> <p>Ovaert, Caroline; Cardiologie pédiatrique et congénitale, Timone</p> |

|           |                                                                                                                                                                                                                                                                                                                                                                                                                                                                                                                                                                                                                                                                                                                                                                                                                                                                                                                                                                                                        |
|-----------|--------------------------------------------------------------------------------------------------------------------------------------------------------------------------------------------------------------------------------------------------------------------------------------------------------------------------------------------------------------------------------------------------------------------------------------------------------------------------------------------------------------------------------------------------------------------------------------------------------------------------------------------------------------------------------------------------------------------------------------------------------------------------------------------------------------------------------------------------------------------------------------------------------------------------------------------------------------------------------------------------------|
|           | <p>enfants, AP-HM et INSERM 1251, Aix-Marseille Université, Marseille France</p> <p>Piéchaud, Jean-François; Institut Hospitalier Jacques-Cartier, 91300 Massy, France.</p> <p>Thambo, Jean-Benoît; Department of Pediatric and Adult Congenital Cardiology, Bordeaux University Hospital (CHU), 33600 Pessac, France</p> <p>Leuraud, Klervi; 1. Institute for Radiological Protection and Nuclear Safety (IRSN), PSE-SANTE/SESANE/Laboratory of Epidemiology, BP 17, 92262 Fontenay-aux-Roses, France</p> <p>Bonnet, Damien; 2. M3C-Necker, Hôpital universitaire Necker-Enfants malades, Université de Paris, Paris, France</p> <p>Bernier, Marie-Odile; 1. Institute for Radiological Protection and Nuclear Safety (IRSN), PSE-SANTE/SESANE/Laboratory of Epidemiology, BP 17, 92262 Fontenay-aux-Roses, France</p> <p>Rage, Estelle; 1. Institute for Radiological Protection and Nuclear Safety (IRSN), PSE-SANTE/SESANE/Laboratory of Epidemiology, BP 17, 92262 Fontenay-aux-Roses, France</p> |
| Keywords: | <p>Congenital heart disease &lt; CARDIOLOGY, Paediatric cardiology &lt; CARDIOLOGY, EPIDEMIOLOGY, Paediatric oncology &lt; ONCOLOGY, CARDIOLOGY, Cancer pain &lt; ONCOLOGY</p>                                                                                                                                                                                                                                                                                                                                                                                                                                                                                                                                                                                                                                                                                                                                                                                                                         |
|           |                                                                                                                                                                                                                                                                                                                                                                                                                                                                                                                                                                                                                                                                                                                                                                                                                                                                                                                                                                                                        |

SCHOLARONE™  
Manuscripts

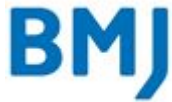

I, the Submitting Author has the right to grant and does grant on behalf of all authors of the Work (as defined in the below author licence), an exclusive licence and/or a non-exclusive licence for contributions from authors who are: i) UK Crown employees; ii) where BMJ has agreed a CC-BY licence shall apply, and/or iii) in accordance with the terms applicable for US Federal Government officers or employees acting as part of their official duties; on a worldwide, perpetual, irrevocable, royalty-free basis to BMJ Publishing Group Ltd ("BMJ") its licensees and where the relevant Journal is co-owned by BMJ to the co-owners of the Journal, to publish the Work in this journal and any other BMJ products and to exploit all rights, as set out in our [licence](#).

The Submitting Author accepts and understands that any supply made under these terms is made by BMJ to the Submitting Author unless you are acting as an employee on behalf of your employer or a postgraduate student of an affiliated institution which is paying any applicable article publishing charge ("APC") for Open Access articles. Where the Submitting Author wishes to make the Work available on an Open Access basis (and intends to pay the relevant APC), the terms of reuse of such Open Access shall be governed by a Creative Commons licence – details of these licences and which [Creative Commons](#) licence will apply to this Work are set out in our licence referred to above.

Other than as permitted in any relevant BMJ Author's Self Archiving Policies, I confirm this Work has not been accepted for publication elsewhere, is not being considered for publication elsewhere and does not duplicate material already published. I confirm all authors consent to publication of this Work and authorise the granting of this licence.

## Exposure to low-dose ionizing radiation from cardiac catheterization and risk of cancer: the COCCINELLE study cohort profile

Kossi D Abalo<sup>1</sup>, Sophie Malekzadeh-Milani<sup>2</sup>, Sébastien Hascoët<sup>3</sup>, Serge Dreuil<sup>4</sup>, Tiphaine Feuillet<sup>5</sup>, Sarah Cohen<sup>3</sup>, Claire Dauphin<sup>6</sup>, Sylvie Di Filippo<sup>7</sup>, Stéphanie Douchin<sup>8</sup>, François Godart<sup>9</sup>, Patrice Guérin<sup>10</sup>, Pauline Helms<sup>11</sup>, Clément Karsenty<sup>12</sup>, Bruno Lefort<sup>13</sup>, Pierre Mauran<sup>14</sup>, Caroline Ovaert<sup>15</sup>, Jean-François Piéchaud<sup>16</sup>, Jean-Benoît Thambo<sup>17</sup>, Klervi Leuraud<sup>1</sup>, Damien Bonnet<sup>2</sup>, Marie-Odile Bernier<sup>1</sup>, Estelle Rage<sup>1</sup>.

### Author information

### Affiliations

1. Institute for Radiological Protection and Nuclear Safety (IRSN), PSE-SANTE/SESANE/Laboratory of Epidemiology, BP 17, 92262 Fontenay-aux-Roses, France
2. M3C-Necker, Hôpital universitaire Necker-Enfants malades, Université de Paris, Paris, France
3. Cardiology department, Hôpital Marie Lannelongue, Le Plessis Robinson, France
4. Institute for Radiological Protection and Nuclear Safety, (IRSN), PSE-SANTE/SER/UEM, BP 17, 92262 Fontenay-aux-Roses, France
5. AMAREXIA, 11 rue Claude Chahu, 75116 Paris, France
6. Cardiology Department, CHU Clermont-Ferrand, Clermont-Ferrand, France
7. Paediatric and Congenital Cardiology Department, Hôpital Femme-Mère-Enfant, Hospices Civils de Lyon, Université Claude Bernard Lyon 1, Lyon, France.
8. Cardiopédiatrie, hôpital couple enfant, CHU Grenoble Alpes, 38043 Grenoble cedex 9, France
9. Service de Cardiologie Infantile et Congénitale, Institut Cœur Poumon, 59037 Lille Cedex France
10. CHU Nantes, INSERM, Nantes Université, Clinique Cardiologique et des Maladies Vasculaires, CIC 1413, Institut du Thorax, Nantes, France.
11. Unit of Cardiopediatrics, University Hospital of Strasbourg, Strasbourg, France
12. Pediatric and Congenital Cardiology, Children's Hospital and INSERM U1048, I2MC, Institut des Maladies Métaboliques et Cardiovasculaires, Université de Toulouse, France
13. Institut des Cardiopathies Congénitales, CHRU Tours, 49 boulevard Béranger, 37000 Tours, France
14. Unité de cardiologie pédiatrique et congénitale, American Memorial Hospital, CHU de Reims, 47 rue Cognacq-Jay, 51092 Reims Cedex, France
15. Cardiologie pédiatrique et congénitale, Timone enfants, AP-HM et INSERM 1251, Aix-Marseille Université, Marseille France
16. Institut Hospitalier Jacques-Cartier, 91300 Massy, France.
17. Department of Pediatric and Adult Congenital Cardiology, Bordeaux University Hospital (CHU), 33600 Pessac, France

1  
2  
3 **Corresponding author**  
4  
5

6 Correspondence to Kossi Abalo, Institute for Radiological Protection and Nuclear Safety (IRSN), PSE-  
7 SANTE/SESANE/Laboratory of Epidemiology, BP 17, 92262 Fontenay-aux-Roses, France. Email:  
8 kossi.abalo@irsn.fr, tel: +33 (0)1 58 35 72 25.  
9  
10  
11  
12  
13  
14  
15  
16  
17  
18  
19  
20  
21  
22  
23  
24  
25  
26  
27  
28  
29  
30  
31  
32  
33  
34  
35  
36  
37  
38  
39  
40  
41  
42  
43  
44  
45  
46  
47  
48  
49  
50  
51  
52  
53  
54  
55  
56  
57  
58  
59  
60

For peer review only

**Author's title and contacts:****Kossi Dovene Abalo****Title:** MPH, MSc, PhD Student**Affiliation:** Institute for Radiological Protection and Nuclear Safety (IRSN), PSE-SANTE/SESANE/ Laboratory of Epidemiology, BP 17, 92262 Fontenay-aux-Roses, France**Contacts:** kossi.abalo@irsn.fr**ORCID** 0000-0001-5064-0215**Sophie Malekzadeh-Milani****Title:** MD**Affiliation:** M3C-Necker, Hôpital universitaire Necker-Enfants malades, Université de Paris, Paris, France**ORCID** 0000-0002-9527-3671**Sébastien Hascoët****Title:** MD, PhD**Affiliation:** M3C Marie-Lannelongue Hospital, National reference centre, Paediatric and Congenital Cardiac Surgery Department, Groupe Hospitalier Saint-Joseph, Paris Saclay University, Plessis-Robinson, France**ORCID:** 0000-0002-8695-0503**Serge Dreuil****Title:** PhD**Affiliation:** Institute for Radiological Protection and Nuclear Safety, (IRSN), PSE-SANTE/SER/UEM, BP 17, 92262 Fontenay-aux-Roses, France**Contacts:** serge.dreuil@irsn.fr**ORCID:** 0000-0002-6160-0670**Tiphaine Feuillet****Title:** MPH**Affiliation:** AMAREXIA, 11 rue Claude Chahu, 75116 Paris, France**Contacts:** tiphaine.feUILlet-amarexia@irsn.fr**Sarah Cohen****Title:** MD, PhD**Affiliation:** M3C Marie-Lannelongue Hospital, Paediatric and Congenital Cardiac Surgery Department, Groupe Hospitalier Saint-Joseph, Paris Saclay University, Plessis-Robinson, France**Claire Dauphin**

1  
2  
3 **Title:** MD

4 **Affiliation:** Cardiology Department, CHU Clermont-Ferrand, 58 rue Montalembert, 63000, Clermont-Ferrand,  
5 France  
6

7  
8  
9 **Sylvie Di Filippo**

10 **Title:** MD, PhD, Professor

11 **Affiliation:** Chef de service, Cardiologie pédiatrique et Congénitale, CHU de Lyon (Paediatric and Congenial  
12 Cardiology Department, Hôpital Femme-Mère-Enfant, Hospices Civils de Lyon, Université Claude Bernard Lyon 1),  
13 Lyon, France.  
14

15 **Contacts:** sylvie.di-filippo@chu-lyon.fr  
16

17  
18  
19 **Stéphanie Douchin**

20 **Title:** MD

21 **Affiliation:** Cardiopédiatrie, hôpital couple enfant, CHU Grenoble Alpes, 38043 Grenoble cedex 9, France

22 **Contacts:** SDouchin@chu-grenoble.fr  
23  
24  
25

26 **François Godart**

27 **Title:** PD, PhD, Professor

28 **Affiliation:** Service de Cardiologie Infantile et Congénitale, Institut Cœur Poumon, 59037 Lille Cedex France

29 **Contacts:** francois.godart@chru-lille.fr  
30  
31  
32

33 **Patrice Guérin**

34 **Title:** MD, PhD, Professor

35 **Affiliation:** Cardiopédiatrie, CHU Nantes (CHU Nantes, INSERM, Nantes Université, Clinique Cardiologique et des  
36 Maladies Vasculaires, CIC 1413, Institut du Thorax), Nantes, France.  
37

38 **Contacts:** patrice.guerin@chu-nantes.fr  
39  
40  
41

42 **Pauline Helms**

43 **Title:** MD, PhD

44 **Affiliation:** Unit of Cardiopediatrics, University Hospital of Strasbourg, Strasbourg, France

45 **Contacts:** Pauline.helms@chru-strasbourg.fr  
46  
47  
48

49 **Clément Karsenty**

50 **Title:** MD

51 **Affiliation:** Pediatric and Congenital Cardiology, Children's Hospital and INSERM U1048, I2MC, Institut des  
52 Maladies Métaboliques et Cardiovasculaires, Université de Toulouse, France  
53

54 **Contacts:** clement.karsenty@hotmail.fr  
55  
56  
57  
58  
59  
60



**Bruno Lefort****Title:** MD, PhD**Affiliation:** Institut des Cardiopathies Congénitales, CHRU Tours, 49 boulevard Béranger, 37000 Tours, France**Contacts:** lefort81@gmail.com**Pierre Mauran****Title:** MD, PhD**Affiliation:** Unité de cardiologie pédiatrique et congénitale, American Memorial Hospital, CHU de Reims, 47 rue Cognacq-Jay, 51092 Reims Cedex, France**Contacts:** pmauran@chu-reims.fr**Caroline Ovaert****Title:** MD, PhD, Professor**Affiliation:** Cardiologie pédiatrique et congénitale, Timone enfants, AP-HM et INSERM 1251, Aix-Marseille Université, Marseille France**Contacts:** caroline.ovaert@ap-hm.fr**ORCID:** 0000-0002-2277-2760**Jean-François Piéchaud****Title:** MD, PhD**Affiliation:** Institut Hospitalier Jacques-Cartier, 91300 Massy, France.**Contacts:** jfpiechaud@gmail.com**Jean-Benoît Thambo****Title:** MD, PhD, Professor**Affiliation:** Department of Pediatric and Adult Congenital Cardiology, Bordeaux University Hospital (CHU), 33600 Pessac, France**Contacts:** jean-benoit.thambo@chu-bordeaux.fr**Klervi Leuraud****Title:** PhD**Affiliation:** Institute for Radiological Protection and Nuclear Safety (IRSN), PSE-SANTE/SESANE/ Laboratory of Epidemiology BP 17, 92262 Fontenay-aux-Roses, France**Contacts:** klervi.leuraud@irsn.fr**ORCID:** 0000-0001-5492-168X**Damien Bonnet****Title:** MD, PhD, Professor

1  
2  
3 **Affiliation:** M3C-Necker, Hôpital universitaire Necker-Enfants malades, Université de Paris, Paris, France

4 **Contacts:** damien.bonnet@nck.ap-hop-paris.fr  
5  
6

7 **Marie-Odile Bernier**

8 **Title:** MD, PhD

9  
10 **Affiliation:** Institute for Radiological Protection and Nuclear Safety (IRSN), PSE-SANTE/SESANE/ Laboratory of  
11 Epidemiology, BP 17, 92262 Fontenay-aux-Roses, France

12 **Contacts:** marie-odile.bernier@irsn.fr

13 **ORCID:** 0000-0001-5807-4596  
14  
15

16  
17 **Estelle Rage**

18 **Title:** PharmD, PhD

19  
20 **Affiliation:** Institute for Radiological Protection and Nuclear Safety (IRSN), PSE-SANTE/SESANE/ Laboratory of  
21 Epidemiology, BP 17, 92262 Fontenay-aux-Roses, France

22 **Contacts:** estelle.rage@irsn.fr

23 **ORCID:** 0000-0002-3251-4124  
24  
25  
26  
27  
28  
29  
30  
31  
32  
33  
34  
35  
36  
37  
38  
39  
40  
41  
42  
43  
44  
45  
46  
47  
48  
49  
50  
51  
52  
53  
54  
55  
56  
57  
58  
59  
60

## Abstract

**Purpose:** The COCCINELLE study is a nationwide retrospective French cohort set up to evaluate the risk of cancer in patients who undergo cardiac catheterization (CC) procedures for diagnosis or treatment of congenital heart disease (CHD) during childhood.

**Participants:** Children who undergo CC procedures from 01/01/2000 to 31/12/2013, before the age of 16 in one of the 15 pediatric cardiology departments which perform pediatric CC in mainland France were included. The follow-up started at the date of the first recorded CC procedure until the exit date, i.e. the date of death, the date of first cancer diagnosis, the date of the 18<sup>th</sup> birthday, or the 31/12/2015, whichever occurred first. The cohort was linked to the National Childhood Cancer Registry to identify patients diagnosed with cancer and with the French National Directory for the Identification of Natural Persons to retrieve the patients' vital status.

**Findings to date:** A total of 17,104 children were included in the cohort and followed for 110,335 person-years, with 22,227 CC procedures collected. Among the patients, 81.6 % received only one procedure. Fifty-nine cancer cases were observed in the cohort. Standardized Incidence Ratios (SIRs) were increased for all-cancer (SIR = 3.8, 95% confidence interval (CI) 2.9, 4.9), leukemia (SIR = 3.3, 95% CI 2.0, 5.4), lymphoma (SIR = 14.9, 95% CI 9.9, 22.5) and solid cancers excluding central nervous system (CNS) tumors (SIR = 3.3, 95% CI 2.0, 5.5) compared with the general population.

**Future plans:** Dose reconstruction is currently underway to estimate individual cumulative doses absorbed to relevant organs, including red bone marrow and brain for respectively hematologic disorders and CNS tumors risk estimation. A dose-response-analysis will be conducted with consideration to confounding factors such as age at exposure, gender, predisposing factors to cancer and other sources of medical diagnostic low-dose ionizing radiation.

### Strengths and limitations of this study

- The study includes a large national sample of children with congenital heart disease who have undergone cardiac catheterization in France.
- Medical information will be collected from medical records and national databases to take into account potential confounding factors such as predisposing conditions to cancer or exposures to other sources of medical diagnostic low-dose ionizing radiation.
- The organ doses due to ionizing radiation will be estimated for each participant.
- Due to the lack of nationwide cancer registry for adults, the evaluation of the quality of the National Health care database to assess the risk of cancer after 18 years of age is underway. The cohort will be matched with the National Health care database and the association between low-doses ionizing radiation exposure and cancer risk beyond the age of 18 years will be assessed.
- The statistical power of the study is limited due to the small size of the study population in view of the low expected cancer risk and the low doses of radiation exposure. The ongoing European Harmonic project, aiming to pool seven national cohorts (Belgium, France, Italy, Germany, Norway, Spain, and UK) will increase the statistical power of the analyses.

## Introduction

Great improvements have been made in medical diagnostic and treatment tools in the recent decades, and modalities using low-dose ionizing radiation (LDIR) have been extensively used in medical routine practices. Patients with congenital heart defect (CHD) benefit from better quality of life and longer life expectancy due to improvements in cardiac imaging and therapeutic procedures such as cardiac catheterization (CC). A steady increase in the number of cardiac imaging and therapeutic procedures using LDIR has been observed in patients with CHD from the 1990s [1–3]. Radiation doses associated to CC procedures are low-to-moderate compared to conventional radiology procedures. However, in some pediatric patients such as transplanted patients and patients with complex heart defects, CC procedures cumulative radiation doses can exceed 100 millisievert (mSv) [4–6]. Furthermore, CHD pediatric patients undergo various forms of other medical X-ray examinations in relation to their condition, including computed tomography (CT), nuclear medicine, and conventional radiology procedures [3, 5, 7–9]. For these patients, about 60% of the cumulative radiation dose come from interventional procedures such as CC [5] and about 80 to 95% come from both interventional and CT procedures [5, 7, 8].

A 1.6 to 2 times higher prevalence of cancer has been reported in adult patients with CHD compared to the general population [10]. Potential explanations to this higher cancer rate include shared genetic or environmental factors, immunosuppression drugs [11, 12], and exposure to medical LDIR procedures [13]. If ionizing radiation is a well-known risk factor of cancer for moderate to high doses, the risk is still debated for doses under 100 mSv, level of doses that can be reached in case of several CC procedures or in case of association between CC and other diagnostic procedures. However, some epidemiological studies have reported an increased cancer risk for doses lower than 50 mSv with risk decreasing with increasing age at exposure [14–16]. Exposure to medical procedures using LDIR in children is an issue as they have a long life expectancy (therefore more time to develop cancer after exposure to LDIR) and they present a higher sensitivity to LDIR than adults (due to their less mature tissues and organs) [17–19]. Data on cancer risk among children and adults with CHD who have undergone cardiac procedures are scarce and only few studies have been published [11, 12, 20–23]. Some investigators reported increased risk of cancer among CHD pediatric patients diagnosed and or treated with CC [12, 22], while others did not report any significant findings [23]. Common limitations to these previous studies were their small size, lack of precise dose assessment and short duration of follow-up.

1  
2  
3 A nationwide cohort of children and young adults who have undergone diagnostic or therapeutic CC for CHD in  
4 childhood, the COCCINELLE (French acronym for *CO*horte sur le risque de *C*ancer après *C*ardiologie  
5 *I*nterventionn*ELLE*) cohort has been established in mainland France. The study aims to assess the risk of cancer in  
6  
7 patients with CHD exposed to LDIR during CC procedures. The aim of this study is to describe the cohort and to  
8  
9 analyze the cancer occurrence in this population in comparison to the general population.  
10  
11  
12

### 13 **Cohort description**

#### 14 **Study design**

15  
16  
17  
18  
19 COCCINELLE is a multicenter cohort study on the risk of cancer in patients with CHD who underwent CC  
20  
21 procedures for diagnosis or treatment during childhood [24]. The study received ethical approval from the French  
22  
23 national data protection commission (*Commission Nationale de l'Informatique et des Libertés*). Retrospective data  
24  
25 collection was conducted in fifteen hospitals in France based on medical records of CC examinations performed in  
26  
27 pediatric cardiology departments.  
28  
29

#### 30 **Patient and public involvement**

31  
32  
33 Patients and/or the public were not involved in the design, or conduct, or reporting, or dissemination plans of this  
34  
35 research.  
36  
37

#### 38 **Subject identification and inclusion**

39  
40  
41 The study participants are patients who underwent their first CC for CHD between 1<sup>st</sup> January 2000 and 31<sup>st</sup>  
42  
43 December 2013, who were aged <16 years at the time of the examination, and who have not been diagnosed with  
44  
45 cancer before the first recorded CC procedure.  
46

47  
48 Medical records for 18,906 patients and their 25,139 CC procedures were obtained from pediatric cardiology  
49  
50 departments. Patients for whom the type of procedure could not be identified from medical records (unknown  
51  
52 procedures) and those with unknown gender or those with missing information on dates (birth, death, examination or  
53  
54 cancer diagnosis date) were excluded as those with a diagnosis of cancer before the first CC. Then, 17,104 patients  
55  
56 with 22,227 procedures were included in the cohort (Figure 1).  
57  
58  
59  
60

### Data collection

Collected data from hospitals include the name, the gender, the place and the date of birth, the identification number, the height and the weight of each patient included in the cohort. The characteristics of the CC procedures such as the date, the type of procedure and the technical details including fluoroscopy time and kerma area product ( $P_{KA}$ ) when available were also collected.

At each participating hospital, the history of the angiographic systems used during the study period including the type and the brand of the system, the type and the size (in centimeters (cm)) of the image detector and the fixed X-ray filtration were collected. In addition, detailed dosimetry reports issued from the system at the end of each CC procedure were collected for a sample of patients. The detailed dosimetry reports include information on primary and secondary angulation, field of view (in cm), source-image distance (in cm), and tube potential (in kilovolt (kV)), as well as air kerma and  $P_{KA}$  per acquisition.

In order to assess a potential confounding effect of the patient's health condition, information on underlying diseases or cancer predisposing factors will be retrieved from various sources including hospital discharge databases or from examination of notes fields in procedures' logbooks.

### Exposure assessment

To assess the possible link between the exposure to LDIR from CC procedures and the subsequent occurrence of cancer, individual doses to specific relevant organs, including red bone marrow and brain for respectively hematologic disorders (leukemia and lymphoma) and central nervous system (CNS) cancer risk estimation, will be estimated. First of all, the CC procedures were grouped into a common classification defined by an expert group of cardiologists (DB, SMM, SH, SC), in order to define families of procedures that are similar. Twelve and three families of procedures were defined respectively for therapeutic and diagnostic procedures (Supplemental material S1). LDIR exposure scenarios will be defined based on available detailed dosimetry reports for each family of procedures, for different patient age group (0-1, 1-5, 5-10, 10-15, and  $\geq 15$  years), and if necessary, for each cardiology department. Based on these exposure scenarios, organ dose computations will be performed with the PCXMC Monte Carlo simulation code (v2.0, STUK, Helsinki, Finland). The organ dose assessment is underway,

1  
2  
3 consequently at this step of the study, only the number of CC procedures will be considered with regard to the cancer  
4 incidence analysis.  
5  
6

### 7 **Follow-up and outcome**

8  
9  
10 Follow-up started at the date of the first recorded CC procedure until the exit date i.e. the date of death, the date of  
11 first cancer diagnosis, the date of the 18<sup>th</sup> birthday, or the 31<sup>st</sup> December 2015, whichever occurred first.  
12  
13

14  
15 Vital status and date of death were obtained through linkage with the French National Directory for the Identification  
16 of Natural Persons (RNIPP). Additional information from medical records allowed to complete vital status when the  
17 linkage of the cohort with the RNIPP failed to identify a patient (25% of the cohort), as the large majority of the  
18 patients were closely followed in the cardiology department for their CHD.  
19  
20  
21  
22  
23

24 Matching the COCCINELLE cohort with the National Childhood Cancer Registry (*Registre National des Cancers de*  
25 *l'Enfant* (RNCE)) allowed to identify patients who had been diagnosed with cancer and to obtain the recorded date  
26 of diagnosis and the type of cancer. The RNCE have been registering all cancer cases in children less than 15 years  
27 old in mainland France, since 1990 for hematologic disorders and since 2000 for solid tumors [25]. Since 2011, the  
28 coverage perimeter of the RNCE has been extended to adolescents under the age of 18 and to residents of French  
29 overseas departments. At the time of the linkage, the cancer registry data were available until 31/12/2015.  
30  
31  
32  
33  
34  
35

36 Since the distribution of childhood cancers according to the histological type and location might be very different  
37 from what is observed in adults, cancers cases are described according to the International  
38 Classification of Disease – Oncology, third edition (ICDO- 3) and grouped further using the International  
39 Classification of Childhood Cancer – third version (ICCC3) [26]. For patients diagnosed with multiple cancers  
40 during the follow-up, only the first occurring cancer was considered, except for non-melanoma skin cancers.  
41  
42  
43  
44  
45  
46

### 47 **Statistical analysis**

48  
49 The cohort characteristics were described as counts, proportions, means (with the standard deviation (SD)) or median  
50 (with the interquartile range (IQR)).  
51  
52  
53  
54  
55  
56  
57  
58  
59  
60



We conducted external comparisons using standardized incidence ratios (SIR) calculated as the ratio of the number of observed cases in the cohort to the number of expected cases based on the national cancer incidence rates provided by the RNCE [25, 27]. The SIRs were standardized by age (0-1, 1-5, 5-10 and 10-15), calendar year (2000-2005, 2005-2010, and 2010-2015), and by gender (male and female). Breslow and Day's approximation [28] was used to estimate 95% confidence intervals (CI) for the SIRs. The SIRs were calculated for five groups of cancer: all-cancer (including all childhood cancer types ICCC3: I - XII), leukemia (ICCC3: Ia, Ib, Id, Ie), lymphoma (ICCC3: IIa-IIc), CNS tumors (ICCC3: IIIb, IIIc, IIIe, IIIf), and solid cancers excluding CNS tumors (ICCC3: IV, VI, VIII - XII).

In order to consider incident cancers possibly associated with CC exposure, we conducted sensitivity analyses in which a minimal exclusion period of two and five years between the first exposure and the cancer onset was applied by excluding respectively, patients who were diagnosed with a cancer within two and five years after the first CC procedure. The SIRs were also computed according to the number of procedure undergone (1, 2, and 3 or more) and a trend test was performed. SIRs analyses were performed in R (R Foundation for Statistical Computing, Vienna, Austria) using the package Epi for the person-years computation and the package popEpi [29]. The statistical significance was defined by  $p < 0.05$ .

## Results

### Characteristics of the study population

The whole cohort consisted of 17,104 subjects, 51% of whom were males. The median duration of follow-up was 5.9 years (IQR 6.4 years), accounting for a total of 110,335 person-years. Children younger than one year at their first CC represented 38.7% of the whole cohort. The median age at exit from the cohort was 10.8 years (IQR 9.3 years). The characteristics of the study patients are described in Table 1.

A total of 22,227 CC procedures were recorded in the cohort (Table 2). The number of procedures received by the patients ranged from 1 to 14; about 82% of the study subjects received only one procedure. Diagnostic procedures represented 8,931 (40.2%) of all procedures performed whereas therapeutic procedures represented 13,296 (59.8 %) (Table 2). Among therapeutic procedures, the most frequent ones were patent ductus arteriosus closure (13.7%), pulmonary valvuloplasty (9.2%), atrial septal defect closure (7.8%), and pulmonary artery dilatation or stenting (5.9%).

## Findings to date

Fifty-nine cancer cases were recorded from 2000 to 2015, among them 34 (57.6%) occurred in males. The median age at cancer diagnosis was 7.4 years (IQR 10.4 years). The cancer types are described in Table 3. The number of procedures per subject was not different between the cancer cases and the non-cancer patients. Thirty-four out of 59 cancers were diagnosed at least two years after the first CC procedures which count 13 (38.2%) lymphomas, 7 (20.6%) leukemia and 14 (41.2%) solid cancers. After a 5-year exclusion period, 15 out of 59 cancer cases were observed with 7 (46.7%) lymphomas, 2 (13.3%) leukemia and 6 (40%) solid cancers.

The results of the analyses comparing cancer incidence in the cohort with that of the general population are presented in Table 4. The SIRs were increased for all-cancer (SIR = 3.8, 95% CI 2.9, 4.9), leukemia (SIR = 3.3, 95% CI 2.0, 5.4), lymphoma (SIR = 14.9, 95% CI 9.9, 22.5) and solid cancers excluding CNS tumors (SIR = 3.3% CI 2.0, 5.5) compared with the general population. In a sensitivity analyses, after exclusion of cases diagnosed within the first 2 years after exposure to the first CC examination, SIRs were increased for all-cancer (SIR = 3.4, 95% CI 2.4, 4.7), leukemia (SIR = 2.3, 95% CI 1.1, 4.9), lymphoma (SIR = 10.8, 95% CI 6.3, 18.7) and solid cancers excluding CNS tumors (SIR = 3.4, 95% CI 1.8, 6.5). When considering a 5-year exclusion period, increased SIRs were observed for all-cancer (SIR = 3.3, 95% CI 2.0, 5.4), lymphoma (SIR = 9.5, 95% CI 4.5, 20.0) and solid cancers excluding CNS tumors (SIR = 4.3, 95% CI 1.8, 10.2). SIRs were increased whatever the number of procedure received (1, 2 and 3 or more) with higher SIR for patients receiving 3 or more procedures (SIR = 6.1, 95% CI 3.0, 12.1) compare to those receiving 1 procedure (SIR = 3.7, 95% CI 2.7, 4.9). However, the p-value for trend in SIRs according to the number of procedures undergone (1, 2 and 3 or more) was not statistically significant, p-value = 0.2 (Table 4).

## Discussion

### Main findings

This first analysis of the COCCINELLE cohort shows a higher incidence of all-cancer, leukemia, lymphoma, and other solid cancer (excluding CNS tumors) in the cohort compared to the general population. In a sensitivity analysis in which all cases occurring during the first 2- and 5-year were excluded, the SIRs remained significantly increased for all-cancer, lymphoma and solid cancer excluding CNS tumors. The SIRs increased non-significantly with the increasing number of procedures received in childhood.

1  
2  
3 The results from the current study are consistent with the two previous studies that reported increased cancer  
4 incidence following pediatric CC for CHD [12, 22] compared to the general population. Modan et al. [12] observed  
5 a SIR of 2.3 (95% CI 1.2, 4.1) based on the follow-up of 674 children between 1950-1970 in Israel and Harbron et  
6 al.[22] reported higher incidence rates for all-cancer (SIR = 2.32; 95% CI: 1.65, 3.17), lymphoma (SIR = 8.34; 95%  
7 CI 5.22, 12.61), and leukemia (SIR = 2.11; 95% CI 0.82, 4.42) in a cohort of 11,270 children exposed when aged  $\leq$   
8 22 years. On the contrary, a study based on the follow-up of 4,891 children and young adults exposed to CC before  
9 the age of 18 between 1946 and 1968 in Canada did not report any significant increase in cancer incidence, with a  
10 SIR of 1.2 (90% CI 0.6, 2.3) [23]. In adult population, an increased SIR for all-cancer was also reported from a study  
11 on patients who had undergone CC for CHD at adulthood [30].

12  
13  
14  
15  
16  
17  
18  
19  
20  
21 CT and CC procedures both deliver X-ray radiation. Recent studies reported radiation doses delivered by CT ranging  
22 from 8 to 12 milliGray (mGy) to the red bone marrow [31–34], a range of doses consistent to the mean dose of 8.8  
23 mGy to the red bone marrow reported from a recent CC study [22]. As cumulative doses due to CT in childhood are  
24 in the range of those delivered by CC procedures, the estimated SIRs in our cohort can be compared to those from  
25 recently published CT studies [32–35]. Findings from the current study are consistent with results from a nationwide  
26 retrospective cohort of 168,394 children who received one or more CT in Dutch hospitals between 1979 and 2012,  
27 when aged <18 years [36]: the SIRs were 1.47 (95% CI 1.34, 1.61) for all-cancer, 1.39 (95% CI 1.13, 1.70) for  
28 hemato-lymphoproliferative disorders, and 2.05 (95%CI 1.48, 2.83) for CNS tumors after applying a 5-year latency  
29 period. In a German study on 39,184 children younger than 15 years who received CT between 1980 and 2010,  
30 Krille et al. [32, 33] reported significant increased SIRs for all-cancer (SIR = 1.82, 95% CI 1.29, 2.50), and  
31 lymphoma (SIR = 2.96, 95% CI 1.42, 5.45).

32  
33  
34  
35  
36  
37  
38  
39  
40  
41  
42  
43 CHD patients usually require ongoing care to monitor their condition that may result in repeated exposure to LDIR  
44 [3, 5, 7–9] and may lead to high cumulative doses. In the current study, the cumulative number of procedure received  
45 (1, 2 and  $\geq 3$  procedures) is used as a surrogate to the cumulative individual doses. A significant increased SIR was  
46 observed whatever the number of CC procedures performed, but a slight non-significant positive trend was observed  
47 in the SIRs according to the increasing number of procedures received (SIR = 3.7, 95% CI 2.7, 4.9 for one  
48 procedure, SIR = 3.2, 95% CI 1.5, 6.8 for 2 procedures and SIR = 6.1, 95% CI 3.0, 12.1 for  $\geq 3$  procedures; p-value  
49 for trends = 0.2). Cohen et al. used the cumulative number of procedure performed to estimate the risk of cancer after  
50  
51  
52  
53  
54  
55  
56  
57  
58  
59  
60

1  
2  
3 exposure to LDIR in adult patients and shown that the cumulative number of procedures and the cumulative effective  
4 dose could lead to similar results [30]. In the current study, however, since no dose assessment and no dose-response  
5 analyses are yet available to explain the increased SIRs according to the cumulative number of procedures received,  
6 this result should be interpreted with caution. An individual dose reconstruction is currently underway to estimate the  
7 cumulative organ doses for each of the cohort members, including the contribution of doses from CTs and other  
8 medical diagnostic radiation procedures. A dose-response analysis will then be performed to confirm or not these  
9 first results.

### 16 17 **Strengths and limitations**

18  
19  
20 The COCCINELLE cohort is the first study in France to assess cancer risk in 17,104 CHD patients who undergone  
21 CC in childhood. The study has access to national well-handled registries which have almost an exhaustive coverage  
22 of the general population. The sample of CHD patient included in the cohort is representative of the pediatric CHD  
23 patients since the major pediatric departments performing CC in mainland France agreed to participate to the study  
24 and contributed actively. However, several limitations should be mentioned.

25  
26  
27  
28  
29  
30  
31 The SIR analyses did not include any information on the dose received during the CC procedures and the results  
32 should be interpreted consequently. Doses estimates are currently underway to provide with accurate dosimetry  
33 data for each patient in the study and cumulative organ doses will be used in the dose response analyses. In  
34 addition, CHD pediatric patients could undergo other diagnostic LDIR procedures such as CT which deliver dose in  
35 the same range as CC, nuclear medicines, and conventional radiographies. The more patients have received CC, the  
36 more they are susceptible to be exposed to other diagnostic medical LDIR. It is important to consider these various  
37 sources of exposure since they can contribute significantly to the overall cumulative organ dose. Further analyses of  
38 the cohort will address this issue in the risk estimate models.

39  
40  
41  
42  
43  
44  
45  
46  
47  
48 The individual dose reconstruction is intended for procedures performed in the cohort, from 2000 to 2013. However  
49 single doses delivered per examination are continuously decreasing due to advances in technologies, protocol  
50 improvements and awareness of cardiologists. Therefore, the dose estimates will not reflect the current dose  
51 reduction practices in cardiology departments and this weakness is inherent to all retrospective epidemiology  
52 studies. Nevertheless, epidemiology studies are still relevant for decision making and radioprotection purposes.

1  
2  
3 Other limitation from the first results of the SIR analyses is the use of the general population as reference group. An  
4 increased risk of cancer in CHD patients compared to the general population has already been reported [13].  
5  
6 Common etiologic factors in CHD patients could be suspected [11, 21] as gene mutations in embryogenesis related  
7  
8 to birth defects and cancer development [37]. Post-transplants are also known to present higher rate of cancer due to  
9  
10 the use of immunosuppression drugs [38]. In the UK study on cancer risk after CC in childhood, 509 out of 11,270  
11  
12 individuals had received a transplanted organ with twenty-six malignancies occurring among these transplanted  
13  
14 patients. The authors reported that all of the lymphoma cases observed in the cohort came from transplanted subjects.  
15  
16 Furthermore, censoring these transplant subjects decreased the SIR for all-cancer from 2.32 (95% CI 1.65, 3.17) to  
17  
18 0.90 (95% CI 0.49, 1.49) [22]. Transplantation status and any other cancer predisposing factors are not considered  
19  
20 in the SIRs analysis and the increased SIRs reported in the present study might be confounded with a potential  
21  
22 effect of underlying cancer predisposing factors such as Down syndrome, Noonan syndrome, severe combined  
23  
24 immune deficiency, etc.  
25

26  
27 Indication bias and reverse causation bias can be suspected when cancer predisposing factors or early symptoms of  
28  
29 undetected cancer are the indication of the examination. In the COCCINELLE cohort study, reverse causation bias  
30  
31 can be ruled out as the indication of CC is always the CHD. However, indication bias should be studied since  
32  
33 medical conditions associated with cancer risk predisposition could also be associated with exposure to LDIR  
34  
35 diagnostic procedures. Then, it will be crucial to take into account individual information on cancer risk  
36  
37 predisposition in the ongoing main analyses. Due to the lack of a national registry on transplantation or genetic  
38  
39 syndromes in France, the COCCINELLE cohort will use information from discharge databases, which are complete  
40  
41 enough to retrieve patients with predisposing factors to cancer [39]. Additionally, information from the National  
42  
43 Health Insurance database will be used for a large part of the studied population. However, the study was not  
44  
45 designed to directly assess the effect of factors such as obesity, socio-economic status, and heredity (for inherited  
46  
47 cancer predisposing factors) in the risk estimate models since these data could not be retrieved directly from medical  
48  
49 record databases.  
50

51 The death rate in the cohort is currently 6.5% for 803 deaths registered in patients for whom this information is  
52  
53 available. Investigators had reported an increased mortality rates among CHD population [40], suggesting that some  
54  
55 subjects might die from the underlying condition (i.e. cardiac dysfunction) before developing cancer. Therefore,  
56  
57

1  
2  
3 competitive risk should be considered in the ongoing analyses to take into account the risk of death before the  
4 studied outcome, i.e. cancer. This was observed in the French cohort study on CTs, where the early increased  
5 mortality in patients with predisposing factors to cancer leads to decreased risks of radiation associated leukemia and  
6 CNS tumor compared to the increased risk observed in patients without predisposing factors to cancer [31].  
7  
8  
9

10  
11 The number of patients lost to follow-up is currently low in the cohort since children with CHD are closely followed  
12 in cardiology departments involved in this study for the monitoring of their conditions. They can be retrieved from  
13 medical records or from National health databases after 2006; however, we are not able to follow patients, who have  
14 emigrated, been diagnosed, or treated outside France borders. The follow-up of our population is currently limited to  
15 the age of 18 years, due to the lack of a nationwide cancer registry for adults. However, the building of a national  
16 cohort of cancer patients since 2010 by the French national cancer institute (*Institut National du Cancer*) based on  
17 the National Health Insurance data will provide a very useful tool to follow the incidence of cancer in our cohort at  
18 adult age [41].  
19  
20  
21  
22  
23  
24  
25  
26

27  
28 In perspective, further improvements of the cohort data including dosimetry data, exposure to other LDIR, and  
29 cancer predisposing factors will be available to provide more insight on the risk of cancer following CC exposure in  
30 childhood.  
31  
32  
33

### 34 **Collaboration**

35  
36  
37 The COCCINELLE study data are not freely available because of ethical and data protection constraints. However,  
38 we welcome inputs from researchers on collaborative projects that will involve the study data. Proposals for possible  
39 collaborations in further analyses of the data should be addressed to Dr Estelle Rage. Currently, such collaboration  
40 have been established in an international collaborative project named Harmonic (Health effects of cArdiac  
41 fluoRoscopy and mOdern radIotherapy in paediatricCs)[42], with the aim of gather the few studies on CC already set-  
42 up in France and in the UK and to build new ones to provide more insight on the association between low to  
43 moderate radiation doses received during childhood and cancer risk.  
44  
45  
46  
47  
48  
49  
50  
51  
52  
53  
54  
55  
56  
57  
58  
59  
60

### Contributorship statement

MOB, ER, KL lead the project at national level, raised the funding, established the cohort, and provided intellectual inputs to the manuscript. KDA and TF were involved in data analysis, data presentation and drafted the manuscript. SMM, SH, SD, SC and DB contributed to the implementation of the project and to the conception of this article. CD, SDF, SD, FG, PG, PH, CK, BL, PM, CO, JFP and JBT were the local investigators of the project. They contributed to the study design and critically revised the manuscript for important intellectual content. All authors critically revised the manuscript and approved the final version.

### Competing interests

None to declare

### Funding

We gratefully acknowledge the support of *La Ligue contre le cancer* (GB/MA/CD/BC 11264) and of the French National Cancer Institute (INCa) (CFB/SZ-07/06-020).

### Data sharing statement

All data from the COCCINELLE study are deposited at the Laboratory of Epidemiology at French Institute for Radiological Protection and Nuclear Safety (IRSN), BP 17, 92262 Fontenay-aux-Roses, France. The COCCINELLE study data sharing is subject to ethical and data protection constraints. Interested researchers can approach ER principal investigator (estelle.rage@irsn.fr) for sharing COCCINELLE data as part of collaborative research projects (if not overlapping with ongoing research projects, and subject to a Data Use Agreement).

### Ethics approval

The study received ethical approval from the French national data protection commission (*Commission Nationale de l'Informatique et des Libertés*), deliberation N°2016-067 of 13/08/2016.



## References

1. Lucas FL, DeLorenzo MA, Siewers AE, Wennberg DE (2006) Temporal trends in the utilization of diagnostic testing and treatments for cardiovascular disease in the United States, 1993–2001. *Circulation* 113:374–379
2. Yang JC-T, Lin M-T, Jaw F-S, Chen S-J, Wang J-K, Shih TT-F, Wu M-H, Li Y-W (2015) Trends in the utilization of computed tomography and cardiac catheterization among children with congenital heart disease. *Journal of the Formosan Medical Association* 114:1061–1068
3. Beauséjour Ladouceur V, Lawler PR, Gurvitz M, Pilote L, Eisenberg MJ, Ionescu-Ittu R, Guo L, Marelli AJ (2016) Exposure to low-dose ionizing radiation from cardiac procedures in patients with congenital heart disease: 15-year data from a population-based longitudinal cohort. *Circulation* 133:12–20
4. Andreassi Maria Grazia, Picano Eugenio (2014) Reduction of Radiation to Children. *Circulation* 130:135–137 . <https://doi.org/10.1161/CIRCULATIONAHA.114.010699>
5. Johnson JN, Hornik CP, Li JS, Benjamin Jr DK, Yoshizumi TT, Reiman RE, Frush DP, Hill KD (2014) Cumulative radiation exposure and cancer risk estimation in children with heart disease. *Circulation* 130:161–167
6. Onnasch D, Schroder F, Fischer G, Kramer H (2007) Diagnostic reference levels and effective dose in paediatric cardiac catheterization. *The British journal of radiology* 80:177–185
7. Ait-Ali L, Andreassi MG, Foffa I, Spadoni I, Vano E, Picano E (2010) Cumulative patient effective dose and acute radiation-induced chromosomal DNA damage in children with congenital heart disease. *Heart* 96:269–274
8. Glatz AC, Purrington KS, Klinger A, King AR, Hellinger J, Zhu X, Gruber SB, Gruber PJ (2014) Cumulative exposure to medical radiation for children requiring surgery for congenital heart disease. *The Journal of pediatrics* 164:789–794
9. Hill KD, Frush DP, Han BK, Abbott BG, Armstrong AK, DeKemp RA, Glatz AC, Greenberg SB, Herbert AS, Justino H (2017) Radiation safety in children with congenital and acquired heart disease: a scientific position statement on multimodality dose optimization from the image gently alliance. *JACC: Cardiovascular imaging* 10:797–818
10. Gurvitz M, Ionescu-Ittu R, Guo L, Eisenberg MJ, Abrahamowicz M, Pilote L, Marelli AJ (2016) Prevalence of cancer in adults with congenital heart disease compared with the general population. *The American journal of cardiology* 118:1742–1750
11. Lee Y-S, Chen Y-T, Jeng M-J, Tsao P-C, Yen H-J, Lee P-C, Li S-Y, Liu C-J, Chen T-J, Chou P (2015) The risk of cancer in patients with congenital heart disease: a nationwide population-based cohort study in Taiwan. *PLoS One* 10:e0116844 . <https://doi.org/https://doi.org/10.1371/journal.pone.0116844>
12. Modan B, Keinan L, Blumstein T, Sadetzki S (2000) Cancer following cardiac catheterization in childhood. *International journal of epidemiology* 29:424–428
13. Cohen S, Gurvitz MZ, Beauséjour-Ladouceur V, Lawler PR, Therrien J, Marelli AJ (2019) Cancer Risk in Congenital Heart Disease—What is The Evidence? *Canadian Journal of Cardiology* 35:1750–1761 . <https://doi.org/https://doi.org/10.1016/j.cjca.2019.09.023>
14. Little MP (2009) Cancer and non-cancer effects in Japanese atomic bomb survivors. *Journal of Radiological Protection* 29:A43



15. Little MP (2008) Leukaemia following childhood radiation exposure in the Japanese atomic bomb survivors and in medically exposed groups. *Radiation Protection Dosimetry* 132:156–165 .  
<https://doi.org/10.1093/rpd/ncn264>
16. Little MP, Wakeford R, Borrego D, French B, Zablotska LB, Adams MJ, Allodji R, de Vathaire F, Lee C, Brenner AV (2018) Leukaemia and myeloid malignancy among people exposed to low doses (< 100 mSv) of ionising radiation during childhood: a pooled analysis of nine historical cohort studies. *The Lancet Haematology* 5:e346–e358
17. Fazel R, Krumholz HM, Wang Y, Ross JS, Chen J, Ting HH, Shah ND, Nasir K, Einstein AJ, Nallamothu BK (2009) Exposure to low-dose ionizing radiation from medical imaging procedures. *New England Journal of Medicine* 361:849–857
18. UNSCEAR: United Nations Scientific Committee on the Effects of Atomic Radiation (2013) Sources, Effects and Risks of Ionizing Radiation. Volume II. Scientific Annex B: Effects of Radiation Exposure of Children. United Nations, New York
19. Van Cleave J, Gortmaker SL, Perrin JM (2010) Dynamics of obesity and chronic health conditions among children and youth. *Journal of the American Medical Association* 303:623–630
20. Bjørge T, Cnattingius S, Lie RT, Tretli S, Engeland A (2008) Cancer risk in children with birth defects and in their families: a population based cohort study of 5.2 million children from Norway and Sweden. *Cancer Epidemiology and Prevention Biomarkers* 17:500–506
21. Fisher PG, Reynolds P, Von Behren J, Carmichael SL, Rasmussen SA, Shaw GM (2012) Cancer in children with nonchromosomal birth defects. *The Journal of pediatrics* 160:978–983
22. Harbron RW, Chapple C-L, O’Sullivan JJ, Lee C, McHugh K, Higuera M, Pearce MS (2018) Cancer incidence among children and young adults who have undergone x-ray guided cardiac catheterization procedures. *European Journal of Epidemiology* 33:393–401 . <https://doi.org/10.1007/s10654-018-0357-0>
23. McLaughlin JR, Kreiger N, Sloan MP, Benson LN, Hilditch S, Clarke EA (1993) An historical cohort study of cardiac catheterization during childhood and the risk of cancer. *International journal of epidemiology* 22:584–591
24. Baysson H, Nkoumazok B, Barnaoui S, Réhel J, Girodon B, Milani G, Boudjemline Y, Bonnet D, Laurier D, Bernier M (2015) Follow-up of children exposed to ionising radiation from cardiac catheterisation: the Coccinelle study. *Radiation protection dosimetry* 165:13–16
25. Lacour B, Guyot-Goubin A, Guissou S, Bellec S, Désandes E, Clavel J (2010) Incidence of childhood cancer in France: national children cancer registries, 2000–2004. *European Journal of Cancer Prevention* 19:173–181
26. Steliarova-Foucher E, Stiller C, Lacour B, Kaatsch P (2005) International classification of childhood cancer. *Cancer* 103:1457–1467
27. Taux d’incidence de 2010 à 2014, par groupe diagnostique et par tranche d’âge - RNCE.  
<https://rnce.inserm.fr/index.php/fr/statistiques/statistiques-d-incidence/taux-d-incidence-de-2010-a-2014-par-groupe-diagnostique-et-par-tranche-d-age>. Accessed 28 Jan 2020
28. Breslow NE, Day NE (1987) *Statistical Methods in Cancer Research Volume II: The Design and Analysis of Cohort Studies*, IARC Scientific Publication. IARC Scientific Publication No. 82, Lyon, France: International Agency for Research on Cancer.
29. Miettinen J, Rantanen M, Seppa K (2019) popEpi: Functions for Epidemiological Analysis using Population Data. R package version 0.4.8. <https://CRAN.R-project.org/package=popEpi>

- 1
- 2
- 3 30. Cohen S, Liu A, Gurvitz M, Guo L, Therrien J, Laprise C, Kaufman JS, Abrahamowicz M, Marelli AJ (2018) Exposure to low-dose ionizing radiation from cardiac procedures and malignancy risk in adults with congenital heart disease. *Circulation* 137:1334–1345
- 4
- 5
- 6
- 7 31. Journy N, Roué T, Cardis E, Le Pointe HD, Brisse H, Chateil J, Laurier D, Bernier M (2016) Childhood CT scans and cancer risk: impact of predisposing factors for cancer on the risk estimates. *Journal of Radiological Protection* 36:N1
- 8
- 9
- 10
- 11 32. Krille L, Dreger S, Schindel R, Albrecht T, Asmussen M, Barkhausen J, Berthold J, Chavan A, Claussen C, Forsting M (2015) Risk of cancer incidence before the age of 15 years after exposure to ionising radiation from computed tomography: results from a German cohort study. *Radiation and environmental biophysics* 54:1–12
- 12
- 13
- 14
- 15
- 16 33. Krille L, Dreger S, Schindel R, Albrecht T, Asmussen M, Barkhausen J, Berthold J, Chavan A, Claussen C, Forsting M (2017) Erratum to: risk of cancer incidence before the age of 15 years after exposure to ionising radiation from computed tomography: results from a German cohort study. *Radiation and environmental biophysics* 56:293–297
- 17
- 18
- 19
- 20
- 21 34. Meulepas JM, Ronckers CM, Smets AMJB, Nievelstein RAJ, Gradowska P, Lee C, Jahnen A, van Straten M, de Wit M-CY, Zonnenberg B, Klein WM, Merks JH, Visser O, van Leeuwen FE, Hauptmann M (2018) Radiation Exposure From Pediatric CT Scans and Subsequent Cancer Risk in the Netherlands. *JNCI: Journal of the National Cancer Institute* 111:256–263 . <https://doi.org/10.1093/jnci/djy104>
- 22
- 23
- 24
- 25 35. Abalo KD, Rage E, Leuraud K, Richardson DB, Le Pointe HD, Laurier D, Bernier M-O (2020) Early life ionizing radiation exposure and cancer risks: systematic review and meta-analysis. *Pediatric radiology* 1–12
- 26
- 27
- 28 36. Meulepas JM, Ronckers CM, Smets AMJB, Nievelstein RAJ, Gradowska P, Lee C, Jahnen A, van Straten M, de Wit M-CY, Zonnenberg B, Klein WM, Merks JH, Visser O, van Leeuwen FE, Hauptmann M (2018) Radiation Exposure From Pediatric CT Scans and Subsequent Cancer Risk in the Netherlands. *JNCI: Journal of the National Cancer Institute* 111:256–263 . <https://doi.org/10.1093/jnci/djy104>
- 29
- 30
- 31
- 32
- 33 37. Narod SA, Hawkins MM, Robertson CM, Stiller CA (1997) Congenital anomalies and childhood cancer in Great Britain. *American journal of human genetics* 60:474
- 34
- 35
- 36 38. Grulich AE, Van Leeuwen MT, Falster MO, Vajdic CM (2007) Incidence of cancers in people with HIV/AIDS compared with immunosuppressed transplant recipients: a meta-analysis. *The Lancet* 370:59–67
- 37
- 38
- 39 39. Bernier M, Mezzarobba M, Maupu E, Caër-Lorho S, Brisse H, Laurier D, Brunelle F, Chatellier G (2012) Role of French hospital claims databases from care units in epidemiological studies: the example of the " Cohorte Enfant Scanner" study. *Revue d'épidémiologie et de sante publique* 60:363–370
- 40
- 41
- 42
- 43 40. Meberg A, Otterstad J, Frøland G, Lindberg H, Sørland S (2000) Outcome of congenital heart defects—a population-based study. *Acta Paediatrica* 89:1344–1351 . <https://doi.org/10.1111/j.1651-2227.2000.tb00763.x>
- 44
- 45
- 46 41. Bousquet PJ, Lefeuvre D, Tuppin P, BenDiane MK, Rocchi M, Bouee-Benhamiche E, Viguier J, Le Bihan-Benjamin C (2018) Cancer care and public health policy evaluations in France: usefulness of the national cancer cohort. *PloS one* 13:e0206448 . <https://doi.org/https://doi.org/10.1371/journal.pone.0206448>
- 47
- 48
- 49 42. Harmonic. In: Harmonic. <https://harmonicproject.eu/>. Accessed 30 Nov 2020
- 50
- 51
- 52
- 53
- 54
- 55
- 56
- 57
- 58
- 59
- 60

## Acknowledgments

We gratefully thank all the staff members of the participating centers for their contribution to this project, in particular we warmly thank Pr Jérôme Petit (Cardiology department, Hôpital Marie Lannelongue, Le Plessis Robinson), Dr Hélène Bouvaist, Dr Isabelle Pin, Dr Julia Rousseau and Mrs Caroline Tournegros (Cardiopédiatrie, hôpital couple enfant, CHU Grenoble Alpes), Dr Nadir Benbrik, Dr Bénédicte Romefort, Dr Laurianne Le Gloan and Dr Karine Warin Fresse (CHU Nantes, Clinique Cardiologique et des Maladies Vasculaires, Nantes), Dr Zakaria Jalal and Dr Xavier Iriart (Department of Paediatric and Adult Congenital Cardiology, Bordeaux University Hospital (CHU), Pessac), Dr Julie Haesebaert (Hospices Civils de Lyon, Pôle de Santé Publique – Service de Recherche et d'Epidémiologie Cliniques, Lyon), Pr Alain Chantepie (Institut des Cardiopathies Congénitales, CHRU Tours), Dr Ivan Bouzguenda (Institut Hospitalier Jacques-Cartier, Massy), Dr Céline Gronier (Institut cardiovasculaire de Strasbourg - Clinique Rhena), Mrs Brigitte Girodon (M3C-Necker, Hôpital universitaire Necker-Enfants malades), Pr Philippe Acar (Pediatric and Congenital Cardiology, Children's Hospital, University of Toulouse), Pr Jean-René Lusson, Mr Pierre-Emmanuel Dine, Mr Joël Guersen and Mr Florian Magnier (Pôle Imagerie Diagnostique et Radiologie Interventionnelle, CHU Clermont Ferrand), Dr Ali Houejeh and Mr Jean-Benoît Baudalet (Service de Cardiologie Infantile et Congénitale, Institut Cœur Poumon, Lille), Dr Angelo Livolsi, Dr Selim Saad (Unit of Cardiopediatrics, University Hospital of Strasbourg, Strasbourg), Mrs Christiane Leleu (Unité de cardiologie pédiatrique et congénitale, American Memorial Hospital, CHU de Reims). This report makes use of data obtained from the French national childhood cancer registry and we acknowledge Dr Brigitte Lacour for her help and her support. This work had received funding from La Ligue contre le cancer (GB/MA/CD/BC 11264) and the French National Cancer Institute (INCa) (CFB/SZ-07/06-020).

Table 1: Description of the COCCINELLE cohort, 2000-2015

|                                                         | Patients with cancer<br>N=59 | Patients without cancer<br>N=17,045 |
|---------------------------------------------------------|------------------------------|-------------------------------------|
| <b>Demographics</b>                                     |                              |                                     |
| Male, N (%)                                             | 34 (57.6)                    | 8,702 (51.1)                        |
| Median age (in year) at first procedure (IQR)           | 2.6 (9.9)                    | 2.2 (7.4)                           |
| Median age (in year) at exit (IQR)                      | 7.4 (10.4)                   | 10.9 (9.3)                          |
| <b>Age at first procedure, N (%)</b>                    |                              |                                     |
| < 1 year                                                | 24 (40.7)                    | 6,589 (38.7)                        |
| 1 – 5 years                                             | 12 (20.3)                    | 4,206 (24.7)                        |
| 5 – 10 years                                            | 8 (13.6)                     | 3,216 (18.9)                        |
| 10 – 15 years                                           | 15 (25.4)                    | 3,034 (17.8)                        |
| <b>Birth period, N (%)</b>                              |                              |                                     |
| [1980, 1990]                                            | 2 (3.4)                      | 484 (2.8)                           |
| ]1990, 2000]                                            | 20 (33.9)                    | 4,273 (25.1)                        |
| ]2000, 2010]                                            | 31 (52.5)                    | 9,511 (55.8)                        |
| ]2010, 2013]                                            | 6 (10.2)                     | 2,777 (16.3)                        |
| <b>Number of procedures received by children, N (%)</b> |                              |                                     |
| 1 procedure                                             | 44 (74.6)                    | 13,929 (81.7)                       |
| 2 procedures                                            | 7 (11.9)                     | 2,021 (11.9)                        |
| ≥ 3 procedures                                          | 8 (13.6)                     | 1,095 (6.4)                         |

*IQR: Interquartile range*

Table 2: Description of the cardiac catheterization procedures received in the COCCINELLE cohort

|                                                                     | Total  | (%)  |
|---------------------------------------------------------------------|--------|------|
| <b>Category of procedures</b>                                       |        |      |
| Therapeutic                                                         | 13,296 | 59,8 |
| Diagnostic                                                          | 8,931  | 40.2 |
| Total                                                               | 22,227 | 100  |
| <b>Most frequent families of procedures</b>                         |        |      |
| Diagnostic cardiac catheterization without angiography <sup>d</sup> | 3,868  | 17.4 |
| Patent ductus arteriosus closure                                    | 3,046  | 13.7 |
| Pulmonary valvuloplasty                                             | 2,052  | 9.2  |
| Atrial septal defect closure                                        | 1,741  | 7.8  |
| Right and left heart angiography <sup>d</sup>                       | 1,466  | 6.6  |
| Left heart angiography <sup>d</sup>                                 | 1,313  | 5.9  |
| Pulmonary artery dilatation or stenting                             | 1,310  | 5.9  |
| Atrial septostomy                                                   | 1,208  | 5.4  |
| Rythmology                                                          | 1,165  | 5.2  |
| Right heart angiography <sup>d</sup>                                | 1,066  | 4.8  |
| Other procedures                                                    | 3,992  | 17.9 |

*d: Diagnostic procedures*

Table 3: Description of the cancers that occurred in the COCCINELLE cohort from 2000 - 2015

| Cancer type                                                              | All period<br>N (%) | After a 2-year<br>exclusion*<br>N (%) | After a 5-year<br>exclusion*<br>N (%) |
|--------------------------------------------------------------------------|---------------------|---------------------------------------|---------------------------------------|
| Leukemia<br>ICCC3: Ia, Ib, Id, Ie                                        | 15 (25.4)           | 7 (20.6)                              | 2 (13.3)                              |
| Lymphoma<br>ICCC3: IIa-IIc                                               | 23 (39.0)           | 13 (38.2)                             | 7 (46.7)                              |
| Central nervous system<br>ICCC3: IIIb, IIIc, IIIe, IIIf                  | 6 (10.2)            | 5 (14.7)                              | 1 (6.7)                               |
| Neuroblastoma and other peripheral<br>nervous cell tumors ICC3: IVa, IVb | 1 (1.7)             | 1 (2.9)                               | 1 (6.7)                               |
| Renal tumors<br>ICCC3: VIa, VIb                                          | 4 (6.8)             | 3 (8.8)                               | -                                     |
| Malignant bone tumors<br>ICCC3: VIII                                     | 1 (1.7)             | -                                     | -                                     |
| Soft tissue and other extra osseous<br>sarcomas ICC3: IXb, IXe           | 4 (6.8)             | 2 (5.9)                               | 2 (13.3)                              |
| Germ cell tumors<br>ICCC3: X                                             | 2 (3.4)             | 1 (2.9)                               | -                                     |
| Other malignant epithelial neoplasms<br>ICCC3: XI                        | 2 (3.4)             | 1 (2.9)                               | 1 (6.7)                               |
| Other and unspecified malignant<br>neoplasms ICC3: XII                   | 1 (1.7)             | 1 (2.9)                               | 1 (6.7)                               |
| <b>All-cancer</b>                                                        | <b>59 (100)</b>     | <b>34 (100)</b>                       | <b>15 (100)</b>                       |

ICCC3: International Classification of Childhood Cancer – third version (ICCC3) [25]

\*: 2- and 5-year exclusion: Exclusion of all -cancer cases diagnosed respectively within 2 or 5 years after the first CC procedure.

Table 4: Standardized incidence ratio (SIR) for cancers in the COCCINELLE cohort

|                                                                               | All-period      |                  | After a 2-year exclusion* |                  | After a 5-year exclusion* |                  |
|-------------------------------------------------------------------------------|-----------------|------------------|---------------------------|------------------|---------------------------|------------------|
|                                                                               | Number of cases | SIR (95% CI)     | Number of cases           | SIR (95% CI)     | Number of cases           | SIR (95% CI)     |
| <b>Type of cancer</b>                                                         |                 |                  |                           |                  |                           |                  |
| All-cancer                                                                    | 59              | 3.8 (2.9; 4.9)   | 34                        | 3.4 (2.4; 4.7)   | 15                        | 3.3 (2.0; 5.4)   |
| Leukemia                                                                      | 15              | 3.3 (2.0; 5.4)   | 7                         | 2.3 (1.1; 4.9)   | 2                         | 1.6 (0.4; 6.6)   |
| Lymphoma                                                                      | 23              | 14.9 (9.9; 22.5) | 13                        | 10.8 (6.3; 18.7) | 7                         | 9.5 (4.5; 20.0)  |
| CNS                                                                           | 6               | 1.5 (0.7; 3.4)   | 5                         | 1.9 (0.8; 4.5)   | 1                         | 0.8 (0.1; 5.5)   |
| Solid cancer**                                                                | 15              | 3.3 (2.0; 5.5)   | 9                         | 3.4 (1.8; 6.5)   | 5                         | 4.3 (1.8; 10.2)  |
| <b>By gender: Male</b>                                                        |                 |                  |                           |                  |                           |                  |
| All-cancer                                                                    | 34              | 3.9 (2.8; 5.5)   | 21                        | 3.7 (2.4; 5.7)   | 7                         | 2.7 (1.3; 5.6)   |
| Leukemia                                                                      | 9               | 3.5 (1.8; 6.7)   | 7                         | 4.1 (1.9; 8.5)   | 2                         | 2.8 (0.7; 11.1)  |
| Lymphoma                                                                      | 16              | 15.3 (9.4; 25.0) | 10                        | 12.3 (6.6; 22.9) | 4                         | 8.2 (3.1; 21.7)  |
| CNS                                                                           | 4               | 1.8 (0.7; 4.9)   | 3                         | 2.0 (0.6; 6.2)   | -                         | -                |
| Solid cancer**                                                                | 5               | 2.2 (0.9; 5.2)   | 1                         | 0.7 (0.1; 5.2)   | 1                         | 1.7 (0.2; 12.2)  |
| <b>By gender: Female</b>                                                      |                 |                  |                           |                  |                           |                  |
| All-cancer                                                                    | 25              | 3.6 (2.5; 5.4)   | 13                        | 3.0 (1.7; 5.1)   | 8                         | 4.1 (2.0; 8.1)   |
| Leukemia                                                                      | 6               | 3.0 (1.4; 6.7)   | -                         | -                | -                         | -                |
| Lymphoma                                                                      | 7               | 14.2 (6.8; 29.7) | 3                         | 7.8 (2.5; 24.1)  | 3                         | 12.2 (3.9; 37.9) |
| CNS                                                                           | 2               | 1.1 (0.3; 4.5)   | 2                         | 1.7 (0.4; 6.7)   | 1                         | 1.8 (0.3; 12.6)  |
| Solid cancer**                                                                | 10              | 4.6 (2.5; 8.5)   | 8                         | 6.1 (3.1; 12.2)  | 4                         | 6.7 (2.5; 17.9)  |
| <b>By age group (all-cancer)</b>                                              |                 |                  |                           |                  |                           |                  |
| < 1 year                                                                      | 1               | 0.9 (0.0; 4.8)   | -                         | -                | -                         | -                |
| 1 – 5 years                                                                   | 23              | 3.7 (2.3; 5.5)   | 13                        | 3.9 (2.1; 6.7)   | -                         | -                |
| 5 – 10 years                                                                  | 12              | 2.7 (1.4; 4.6)   | 8                         | 2.1 (0.9; 4.2)   | 6                         | 2.4 (0.9; 5.3)   |
| 10 – 15 years                                                                 | 14              | 3.9 (2.1; 6.5)   | 8                         | 2.7 (1.2; 5.3)   | 6                         | 2.8 (1.0; 6.2)   |
| <b>By calendar period (all-cancer)</b>                                        |                 |                  |                           |                  |                           |                  |
| 2000 - 2005                                                                   | 8               | 4.2 (2.1; 8.4)   | 1                         | 1.6 (0.2; 11.6)  | -                         | -                |
| 2005 - 2010                                                                   | 23              | 4.3 (2.9; 6.5)   | 13                        | 3.9 (2.3; 6.7)   | 5                         | 4.5 (1.9; 10.9)  |
| 2010 - 2015                                                                   | 28              | 3.4 (2.3; 4.9)   | 20                        | 3.3 (2.1; 5.1)   | 10                        | 2.9 (1.6; 5.4)   |
| <b>Number of the cardiac catheterization procedures received (all-cancer)</b> |                 |                  |                           |                  |                           |                  |
| 1                                                                             | 44              | 3.7 (2.7; 4.9)   | 24                        | 3.1 (2.1; 4.7)   | 7                         | 2.1 (1; 4.3)     |

|                    |   |                 |   |                 |   |                 |
|--------------------|---|-----------------|---|-----------------|---|-----------------|
| 2                  | 7 | 3.2 (1.5; 6.8)  | 5 | 3.4 (1.4; 8.2)  | 4 | 5.7 (2.1; 15.2) |
| 3 or more          | 8 | 6.1 (3.0; 12.1) | 5 | 5.5 (2.3; 13.1) | 4 | 8.8 (3.3; 23.3) |
| <i>p-value</i> *** |   | 0.2             |   | 0.2             |   | < 0.01          |

*CNS: Central nervous system tumors*

*SIR: Standardized Incidence Ratio*

*95% CI: 95% Confidence Interval*

*\*: 2- and 5-year exclusion: Exclusion of all -cancer cases diagnosed respectively within 2 or 5 years after the first CC procedure*

*\*\* : Solid cancer excluding central nervous system tumors*

*\*\*\*: p-value for trends.*

For peer review only



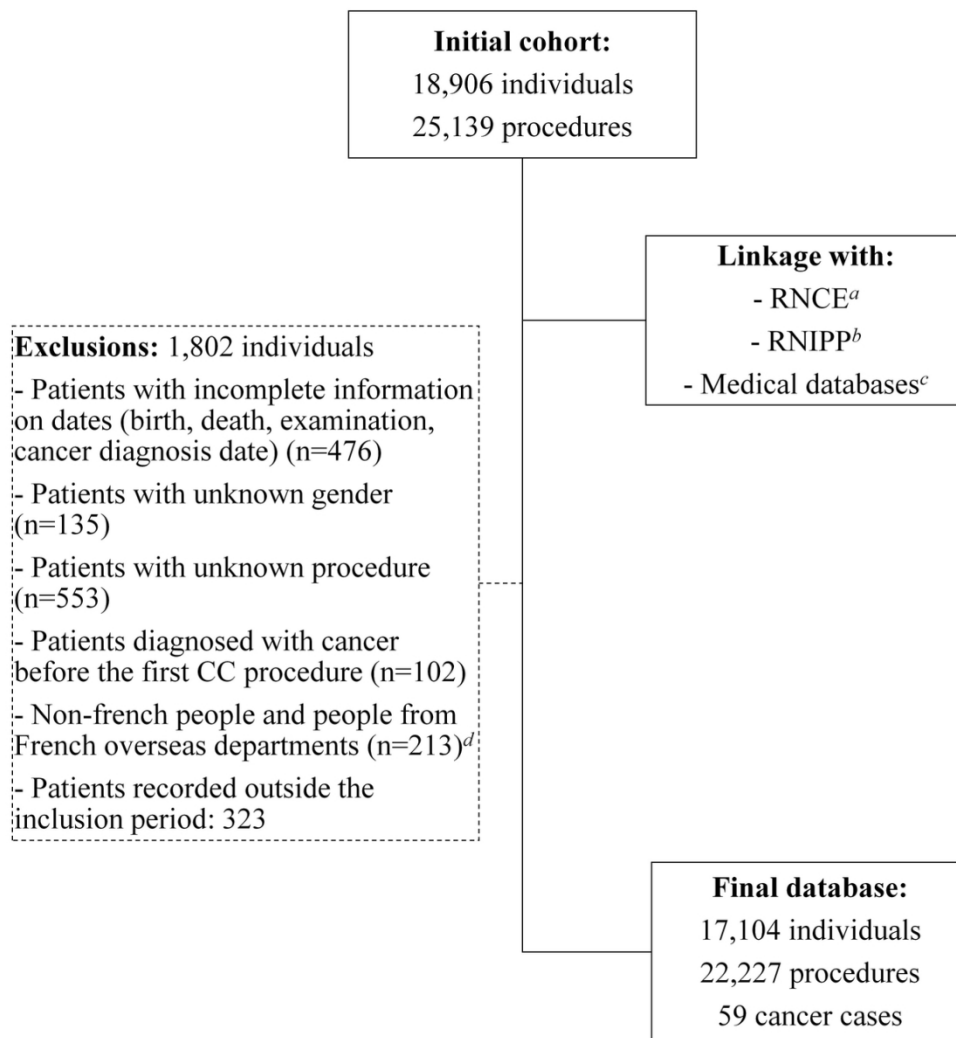

41  
42  
43  
44  
45  
46  
47  
48  
49  
50  
51  
52  
53  
54  
55  
56  
57  
58  
59  
60

Figure 1: Flow chart of the COCCINELLE cohort constitution

- a: RNCE: French National Childhood Cancer Registry (Registre National des Cancers de l'Enfant)  
b: RNIPP: French National Directory for the Identification of Natural Persons  
c: Medical discharge and reimbursement databases  
d: French overseas departments not covered by the RNCE before 2011  
CC: Cardiac catheterization

109x118mm (300 x 300 DPI)

## Supplemental material

S1: Category and family classification of cardiac catheterization procedures in the COCCINELLE cohort

| Category of procedures                                                                   | Family of procedures                                                  | Names of the procedures                                                    |
|------------------------------------------------------------------------------------------|-----------------------------------------------------------------------|----------------------------------------------------------------------------|
| Diagnostic procedures                                                                    | Right heart angiography                                               | - Catheterization right with contrast                                      |
|                                                                                          | Diagnostic procedures without angiography                             | - Catheterization right without contrast                                   |
|                                                                                          |                                                                       | - Catheterization left without contrast                                    |
|                                                                                          |                                                                       | - Catheterization left and right without contrast                          |
| Left heart angiography                                                                   | Pulmonary arterial hypertension                                       | - Biopsy endo-myocardial                                                   |
|                                                                                          |                                                                       | - Pulmonary arterial hypertension with normal heart                        |
|                                                                                          |                                                                       | - Pulmonary arterial hypertension shunt (Eisenmenger)                      |
|                                                                                          | - Catheterization left with contrast                                  |                                                                            |
| Therapeutic procedures                                                                   | Pulmonary valvuloplasty                                               | - Pulmonary valve dilatation                                               |
|                                                                                          |                                                                       | - Pulmonary atresia intact ventricular septum, radiofrequency, perforation |
|                                                                                          |                                                                       | - Perforation pulmonary valve                                              |
|                                                                                          | Aortic valvuloplasty                                                  | - Aortic valve dilatation                                                  |
|                                                                                          | Rashkind                                                              | - Atrial septostomy                                                        |
|                                                                                          | Aortic dilatation / stenting                                          | - Balloon dilatation of coarctation of the aorta                           |
| - Stenting of aortic coarctation                                                         |                                                                       |                                                                            |
| Pulmonary artery dilatation / stenting                                                   | - Balloon dilatation of pulmonary artery: unique / multiple           |                                                                            |
|                                                                                          | - Balloon dilatation of pulmonary artery                              |                                                                            |
|                                                                                          | - Balloon dilatation of right ventricle - pulmonary artery conduit    |                                                                            |
|                                                                                          | - Balloon dilatation of homograft                                     |                                                                            |
|                                                                                          | - Balloon dilatation of pulmonary artery banding                      |                                                                            |
|                                                                                          | - Stenting of pulmonary artery branch: unique stent / multiple stents |                                                                            |
|                                                                                          | - Stenting of pulmonary artery trunk: unique stent / multiple stents  |                                                                            |
| - Stenting of right ventricle - pulmonary artery conduit: unique stent / multiple stents |                                                                       |                                                                            |
| - Percutaneous pulmonary valve implantation                                              |                                                                       |                                                                            |
| - Patent ductus arteriosus dilatation                                                    |                                                                       |                                                                            |

1  
2  
3  
4  
5  
6  
7  
8  
9  
10  
11  
12  
13  
14  
15  
16  
17  
18  
19  
20  
21  
22  
23  
24  
25  
26  
27  
28  
29  
30  
31  
32  
33  
34  
35  
36  
37  
38  
39  
40  
41  
42  
43  
44  
45  
46  
47  
48  
49  
50  
51  
52  
53  
54  
55  
56  
57  
58  
59  
60

|                                         |                                                                                                                                                                                                                                                                                                                                                                                                                                                                                                                                                                                                                                                                                                                                                                                                                                                                                                                                                                                                                                                                                                                                                                      |
|-----------------------------------------|----------------------------------------------------------------------------------------------------------------------------------------------------------------------------------------------------------------------------------------------------------------------------------------------------------------------------------------------------------------------------------------------------------------------------------------------------------------------------------------------------------------------------------------------------------------------------------------------------------------------------------------------------------------------------------------------------------------------------------------------------------------------------------------------------------------------------------------------------------------------------------------------------------------------------------------------------------------------------------------------------------------------------------------------------------------------------------------------------------------------------------------------------------------------|
| Various angiography                     | <ul style="list-style-type: none"> <li>- Balloon dilatation of superior vena cava</li> <li>- Superior vena cava stenting</li> <li>- Balloon dilatation of inferior vena cava</li> <li>- Inferior vena cava stenting</li> <li>- Balloon dilatation of pulmonary vena</li> <li>- Pulmonary vein stenting: unique / multiple</li> <li>- Balloon dilatation of coronary artery</li> <li>- Stenting Coronary: unique / multiple</li> <li>- Patent ductus arteriosus stent (non-neotal)</li> <li>- Major aortopulmonary collateral arteries: unique/ multiples</li> <li>- Balloon dilatation of Blalock</li> <li>- Stenting Blalock: unique/ multiples</li> <li>- Thrombo-aspiration, Vertical vein closure, Occlusion femoral artery, stenting iliac artery, Stenting subclavian artery.</li> <li>- Percutaneous removal of a foreign body</li> <li>- Arterio-venous fistula embolization: unique/ multiples</li> <li>- Blalock embolization</li> <li>- Fenestration closure</li> <li>- Sequestration closure: unique / multiple</li> <li>- Coronary fistula closure: unique / multiple</li> <li>- Aorto-pulmonary collaterals embolization: unique / multiple</li> </ul> |
| Complex neonatal procedures             | <ul style="list-style-type: none"> <li>- Hybrid procedures</li> <li>- Patent ductus arteriosus stenting</li> <li>- Atrial septal defect creation</li> <li>- Atrial septal defect stenting</li> </ul>                                                                                                                                                                                                                                                                                                                                                                                                                                                                                                                                                                                                                                                                                                                                                                                                                                                                                                                                                                 |
| Atrial septal defect closure            | <ul style="list-style-type: none"> <li>- Atrial septal defect closure</li> <li>- Patent foramen ovale</li> </ul>                                                                                                                                                                                                                                                                                                                                                                                                                                                                                                                                                                                                                                                                                                                                                                                                                                                                                                                                                                                                                                                     |
| Ventricular Septal Defect (VSD) closure | <ul style="list-style-type: none"> <li>- Ventricular septal defect closure</li> </ul>                                                                                                                                                                                                                                                                                                                                                                                                                                                                                                                                                                                                                                                                                                                                                                                                                                                                                                                                                                                                                                                                                |
| Arterial duct closure                   | <ul style="list-style-type: none"> <li>- Patent ductus arteriosus closure: coil / plug</li> </ul>                                                                                                                                                                                                                                                                                                                                                                                                                                                                                                                                                                                                                                                                                                                                                                                                                                                                                                                                                                                                                                                                    |
| Rythmology: stimulation                 | <ul style="list-style-type: none"> <li>- Pacemaker</li> <li>- Defibrilators</li> <li>- Pacing</li> </ul>                                                                                                                                                                                                                                                                                                                                                                                                                                                                                                                                                                                                                                                                                                                                                                                                                                                                                                                                                                                                                                                             |
| Rythmology: electrophysiology           | <ul style="list-style-type: none"> <li>- Electrophysiology, Flutter, Kent</li> </ul>                                                                                                                                                                                                                                                                                                                                                                                                                                                                                                                                                                                                                                                                                                                                                                                                                                                                                                                                                                                                                                                                                 |
| Other procedures                        | <p>Other unclassified procedures</p> <ul style="list-style-type: none"> <li>- Catheterization left and right with contrast</li> <li>- Biopsy and coronarography</li> <li>- Tricuspid dilatation</li> <li>- Mitral valve dilatation</li> <li>- Aorto-pulmonary window (aorto-pulmonary septal defect)</li> </ul>                                                                                                                                                                                                                                                                                                                                                                                                                                                                                                                                                                                                                                                                                                                                                                                                                                                      |

# BMJ Open

## Exposure to low-dose ionizing radiation from cardiac catheterization and risk of cancer: the COCCINELLE study cohort profile

|                               |                                                                                                                                                                                                                                                                                                                                                                                                                                                                                                                                                                                                                                                                                                                                                                                                                                                                                                                                                                                                                                                                                                                                                                                                                                                                                                                                                                                                                                                                                                                                                                                                                                                                                                                                                                                                                                                                                                                                                                                                                                                                                                                                                                                                                                                                                                |
|-------------------------------|------------------------------------------------------------------------------------------------------------------------------------------------------------------------------------------------------------------------------------------------------------------------------------------------------------------------------------------------------------------------------------------------------------------------------------------------------------------------------------------------------------------------------------------------------------------------------------------------------------------------------------------------------------------------------------------------------------------------------------------------------------------------------------------------------------------------------------------------------------------------------------------------------------------------------------------------------------------------------------------------------------------------------------------------------------------------------------------------------------------------------------------------------------------------------------------------------------------------------------------------------------------------------------------------------------------------------------------------------------------------------------------------------------------------------------------------------------------------------------------------------------------------------------------------------------------------------------------------------------------------------------------------------------------------------------------------------------------------------------------------------------------------------------------------------------------------------------------------------------------------------------------------------------------------------------------------------------------------------------------------------------------------------------------------------------------------------------------------------------------------------------------------------------------------------------------------------------------------------------------------------------------------------------------------|
| Journal:                      | <i>BMJ Open</i>                                                                                                                                                                                                                                                                                                                                                                                                                                                                                                                                                                                                                                                                                                                                                                                                                                                                                                                                                                                                                                                                                                                                                                                                                                                                                                                                                                                                                                                                                                                                                                                                                                                                                                                                                                                                                                                                                                                                                                                                                                                                                                                                                                                                                                                                                |
| Manuscript ID                 | bmjopen-2020-048576.R1                                                                                                                                                                                                                                                                                                                                                                                                                                                                                                                                                                                                                                                                                                                                                                                                                                                                                                                                                                                                                                                                                                                                                                                                                                                                                                                                                                                                                                                                                                                                                                                                                                                                                                                                                                                                                                                                                                                                                                                                                                                                                                                                                                                                                                                                         |
| Article Type:                 | Cohort profile                                                                                                                                                                                                                                                                                                                                                                                                                                                                                                                                                                                                                                                                                                                                                                                                                                                                                                                                                                                                                                                                                                                                                                                                                                                                                                                                                                                                                                                                                                                                                                                                                                                                                                                                                                                                                                                                                                                                                                                                                                                                                                                                                                                                                                                                                 |
| Date Submitted by the Author: | 03-Apr-2021                                                                                                                                                                                                                                                                                                                                                                                                                                                                                                                                                                                                                                                                                                                                                                                                                                                                                                                                                                                                                                                                                                                                                                                                                                                                                                                                                                                                                                                                                                                                                                                                                                                                                                                                                                                                                                                                                                                                                                                                                                                                                                                                                                                                                                                                                    |
| Complete List of Authors:     | <p>Abalo, Kossi Dovene; IRSN, PSE-SANTE/SESANE/Laboratory of Epidemiology<br/> Malekzadeh-Milani , Sophie; 2. M3C-Necker, Hôpital universitaire Necker-Enfants malades, Université de Paris, Paris, France<br/> Hascoët, Sébastien; M3C Marie-Lannelongue Hospital, National reference centre, Paediatric and Congenital Cardiac Surgery Department, Groupe Hospitalier Saint-Joseph, Paris Saclay University, Plessis-Robinson, France<br/> Dreuil, Serge; IRSN, PSE-SANTE/SER/UEM<br/> Feuillet, Tiphaine; AMAREXIA, 11 rue Claude Chahu, 75116 Paris, France<br/> Cohen, Sarah; M3C Marie-Lannelongue Hospital, National reference centre, Paediatric and Congenital Cardiac Surgery Department, Groupe Hospitalier Saint-Joseph, Paris Saclay University<br/> Dauphin, Claire; Hopital Gabriel Montpied, Cardiology and Vascular Department<br/> Di-Filippo, Sylvie; 6. Paediatric and Congenital Cardiology Department, Hôpital Femme-Mère-Enfant, Hospices Civils de Lyon, Université Claude Bernard Lyon 1, Lyon, France.<br/> Douchin, Stéphanie; Cardiopédiatrie, hôpital couple enfant, CHU Grenoble Alpes, 38043 Grenoble cedex 9, France<br/> Godart, François; Service de Cardiologie Infantile et Congénitale, Institut Cœur Poumon, 59037 Lille Cedex France<br/> Guérin, Patrice; Cardiopédiatrie, CHU Nantes (CHU Nantes, INSERM, Nantes Université, Clinique Cardiologique et des Maladies Vasculaires, CIC 1413, Institut du Thorax), Nantes, France.<br/> Helms, Pauline; Unit of Cardiopediatrics, University Hospital of Strasbourg, Strasbourg, France<br/> Karsenty, Clement; Pediatric and Congenital Cardiology, Children's Hospital and INSERM U1048, I2MC, Institut des Maladies Métaboliques et Cardiovasculaires, Université de Toulouse, France<br/> Lefort, Bruno; Institut des Cardiopathies Congénitales, CHRU Tours, 49 boulevard Béranger, 37000 Tours, France<br/> Mauran, Pierre; Unité de cardiologie pédiatrique et congénitale, American Memorial Hospital, CHU de Reims, 47 rue Cognacq-Jay, 51092 Reims Cedex, France<br/> Ovaert, Caroline; Cardiologie pédiatrique et congénitale, Timone enfants, AP-HM et INSERM 1251, Aix-Marseille Université, Marseille France<br/> Piéchaud, Jean-François; Institut Hospitalier Jacques-Cartier, 91300</p> |

|                                 |                                                                                                                                                                                                                                                                                                                                                                                                                                                                                                                                                           |
|---------------------------------|-----------------------------------------------------------------------------------------------------------------------------------------------------------------------------------------------------------------------------------------------------------------------------------------------------------------------------------------------------------------------------------------------------------------------------------------------------------------------------------------------------------------------------------------------------------|
|                                 | <p>Massy, France.<br/>         Thambo, Jean-Benoît; Department of Pediatric and Adult Congenital Cardiology, Bordeaux University Hospital (CHU), 33600 Pessac, France<br/>         Leuraud, Klervi; IRSN, PSE-SANTE/SESANE/Laboratory of Epidemiology<br/>         Bonnet, Damien; 2. M3C-Necker, Hôpital universitaire Necker-Enfants malades, Université de Paris, Paris, France<br/>         Bernier, Marie-Odile; IRSN, PSE-SANTE/SESANE/Laboratory of Epidemiology<br/>         Rage, Estelle; IRSN, PSE-SANTE/SESANE/Laboratory of Epidemiology</p> |
| <b>Primary Subject Heading</b>: | Epidemiology                                                                                                                                                                                                                                                                                                                                                                                                                                                                                                                                              |
| Secondary Subject Heading:      | Epidemiology                                                                                                                                                                                                                                                                                                                                                                                                                                                                                                                                              |
| Keywords:                       | Congenital heart disease < CARDIOLOGY, Paediatric cardiology < CARDIOLOGY, EPIDEMIOLOGY, Paediatric oncology < ONCOLOGY, CARDIOLOGY, Cancer pain < ONCOLOGY                                                                                                                                                                                                                                                                                                                                                                                               |
|                                 |                                                                                                                                                                                                                                                                                                                                                                                                                                                                                                                                                           |

SCHOLARONE™  
 Manuscripts



I, the Submitting Author has the right to grant and does grant on behalf of all authors of the Work (as defined in the below author licence), an exclusive licence and/or a non-exclusive licence for contributions from authors who are: i) UK Crown employees; ii) where BMJ has agreed a CC-BY licence shall apply, and/or iii) in accordance with the terms applicable for US Federal Government officers or employees acting as part of their official duties; on a worldwide, perpetual, irrevocable, royalty-free basis to BMJ Publishing Group Ltd ("BMJ") its licensees and where the relevant Journal is co-owned by BMJ to the co-owners of the Journal, to publish the Work in this journal and any other BMJ products and to exploit all rights, as set out in our [licence](#).

The Submitting Author accepts and understands that any supply made under these terms is made by BMJ to the Submitting Author unless you are acting as an employee on behalf of your employer or a postgraduate student of an affiliated institution which is paying any applicable article publishing charge ("APC") for Open Access articles. Where the Submitting Author wishes to make the Work available on an Open Access basis (and intends to pay the relevant APC), the terms of reuse of such Open Access shall be governed by a Creative Commons licence – details of these licences and which [Creative Commons](#) licence will apply to this Work are set out in our licence referred to above.

Other than as permitted in any relevant BMJ Author's Self Archiving Policies, I confirm this Work has not been accepted for publication elsewhere, is not being considered for publication elsewhere and does not duplicate material already published. I confirm all authors consent to publication of this Work and authorise the granting of this licence.

1  
2  
3  
4 **Exposure to low-dose ionizing radiation from cardiac catheterization and risk of cancer: the COCCINELLE**  
5 **study cohort profile**  
6  
7

8 Kossi D Abalo<sup>1</sup>, Sophie Malekzadeh-Milani<sup>2</sup>, Sébastien Hascoët<sup>3</sup>, Serge Dreuil<sup>4</sup>, Tiphaine Feuillet<sup>5</sup>, Sarah Cohen<sup>3</sup>,  
9 Claire Dauphin<sup>6</sup>, Sylvie Di Filippo<sup>7</sup>, Stéphanie Douchin<sup>8</sup>, François Godart<sup>9</sup>, Patrice Guérin<sup>10</sup>, Pauline Helms<sup>11</sup>, Clément  
10 Karsenty<sup>12</sup>, Bruno Lefort<sup>13</sup>, Pierre Mauran<sup>14</sup>, Caroline Ovaert<sup>15</sup>, Jean-François Piéchaud<sup>16</sup>, Jean-Benoît Thambo<sup>17</sup>,  
11 Klervi Leuraud<sup>1</sup>, Damien Bonnet<sup>2</sup>, Marie-Odile Bernier<sup>1</sup>, Estelle Rage<sup>1</sup>.  
12  
13

14  
15 **Author information**  
16

17  
18 **Affiliations**  
19

- 
- 20 1. Institute for Radiological Protection and Nuclear Safety (IRSN), PSE-SANTE/SESANE/Laboratory of  
21 Epidemiology, BP 17, 92262 Fontenay-aux-Roses, France
  - 22 2. M3C-Necker, Hôpital universitaire Necker-Enfants malades, Université de Paris, Paris, France
  - 23 3. Cardiology department, Hôpital Marie Lannelongue, Le Plessis Robinson, France
  - 24 4. Institute for Radiological Protection and Nuclear Safety, (IRSN), PSE-SANTE/SER/UEM, BP 17, 92262  
25 Fontenay-aux-Roses, France
  - 26 5. AMAREXIA, 11 rue Claude Chahu, 75116 Paris, France
  - 27 6. Cardiology Department, CHU Clermont-Ferrand, Clermont-Ferrand, France
  - 28 7. Paediatric and Congenital Cardiology Department, Hôpital Femme-Mère-Enfant, Hospices Civils de Lyon,  
29 Université Claude Bernard Lyon 1, Lyon, France.
  - 30 8. Cardiopédiatrie, hôpital couple enfant, CHU Grenoble Alpes, 38043 Grenoble cedex 9, France
  - 31 9. Service de Cardiologie Infantile et Congénitale, Institut Cœur Poumon, 59037 Lille Cedex France
  - 32 10. CHU Nantes, INSERM, Nantes Université, Clinique Cardiologique et des Maladies Vasculaires, CIC 1413,  
33 Institut du Thorax, Nantes, France.
  - 34 11. Unit of Cardiopediatrics, University Hospital of Strasbourg, Strasbourg, France
  - 35 12. Pediatric and Congenital Cardiology, Children's Hospital and INSERM U1048, I2MC, Institut des Maladies  
36 Métaboliques et Cardiovasculaires, Université de Toulouse, France
  - 37 13. Institut des Cardiopathies Congénitales, CHRU Tours, 49 boulevard Béranger, 37000 Tours, France
  - 38 14. Unité de cardiologie pédiatrique et congénitale, American Memorial Hospital, CHU de Reims, 47 rue  
39 Cognacq-Jay, 51092 Reims Cedex, France
  - 40 15. Cardiologie pédiatrique et congénitale, Timone enfants, AP-HM et INSERM 1251, Aix-Marseille  
41 Université, Marseille France
  - 42 16. Institut Hospitalier Jacques-Cartier, 91300 Massy, France.
  - 43 17. Department of Pediatric and Adult Congenital Cardiology, Bordeaux University Hospital (CHU), 33600  
44 Pessac, France  
45  
46  
47  
48  
49  
50  
51  
52  
53  
54  
55  
56  
57  
58  
59  
60

1  
2  
3 **Corresponding author**  
4

5  
6 Correspondence to Kossi Abalo, Institute for Radiological Protection and Nuclear Safety (IRSN), PSE-  
7 SANTE/SESANE/Laboratory of Epidemiology, BP 17, 92262 Fontenay-aux-Roses, France. Email:  
8 kossi.abalo@irsn.fr, tel: +33 (0)1 58 35 72 25.  
9  
10  
11  
12  
13  
14  
15  
16  
17  
18  
19  
20  
21  
22  
23  
24  
25  
26  
27  
28  
29  
30  
31  
32  
33  
34  
35  
36  
37  
38  
39  
40  
41  
42  
43  
44  
45  
46  
47  
48  
49  
50  
51  
52  
53  
54  
55  
56  
57  
58  
59  
60

For peer review only



**Author's title and contacts:****Kossi Dovene Abalo****Title:** MPH, MSc, PhD Student**Affiliation:** Institute for Radiological Protection and Nuclear Safety (IRSN), PSE-SANTE/SESANE/ Laboratory of Epidemiology, BP 17, 92262 Fontenay-aux-Roses, France**Contacts:** kossi.abalo@irsn.fr**ORCID** 0000-0001-5064-0215**Sophie Malekzadeh-Milani****Title:** MD**Affiliation:** M3C-Necker, Hôpital universitaire Necker-Enfants malades, Université de Paris, Paris, France**Contacts:** guiti.milani@gmail.com**ORCID** 0000-0002-9527-3671**Sébastien Hascoët****Title:** MD, PhD**Affiliation:** M3C Marie-Lannelongue Hospital, National reference centre, Paediatric and Congenital Cardiac Surgery Department, Groupe Hospitalier Saint-Joseph, Paris Saclay University, Plessis-Robinson, France**Contacts:** hascoets@gmail.com**ORCID:** 0000-0002-8695-0503**Serge Dreuil****Title:** PhD**Affiliation:** Institute for Radiological Protection and Nuclear Safety, (IRSN), PSE-SANTE/SER/UEM, BP 17, 92262 Fontenay-aux-Roses, France**Contacts:** serge.dreuil@irsn.fr**ORCID:** 0000-0002-6160-0670**Tiphaine Feuillet****Title:** MPH**Affiliation:** AMAREXIA, 11 rue Claude Chahu, 75116 Paris, France**Contacts:** tiphaine.feUILlet-amarexia@irsn.fr**Sarah Cohen****Title:** MD, PhD**Affiliation:** M3C Marie-Lannelongue Hospital, Paediatric and Congenital Cardiac Surgery Department, Groupe Hospitalier Saint-Joseph, Paris Saclay University, Plessis-Robinson, France

1  
2  
3 **Contacts:** s.cohen@ghpsj.fr  
4  
5

6 **Claire Dauphin**

7 **Title:** MD

8 **Affiliation:** Cardiology Department, CHU Clermont-Ferrand, 58 rue Montalembert, 63000, Clermont-Ferrand,  
9 France

10 **Contacts:** cdauphin@chu-clermontferrand.fr  
11  
12  
13

14 **Sylvie Di Filippo**

15 **Title:** MD, PhD, Professor

16 **Affiliation:** Chef de service, Cardiologie pédiatrique et Congénitale, CHU de Lyon (Paediatric and Congential  
17 Cardiology Department, Hôpital Femme-Mère-Enfant, Hospices Civils de Lyon, Université Claude Bernard Lyon 1),  
18 Lyon, France.

19 **Contacts:** sylvie.di-filippo@chu-lyon.fr  
20  
21  
22  
23

24 **Stéphanie Douchin**

25 **Title:** MD

26 **Affiliation:** Cardiopédiatrie, hôpital couple enfant, CHU Grenoble Alpes, 38043 Grenoble cedex 9, France

27 **Contacts:** SDouchin@chu-grenoble.fr  
28  
29  
30  
31

32 **François Godart**

33 **Title:** PD, PhD, Professor

34 **Affiliation:** Service de Cardiologie Infantile et Congénitale, Institut Cœur Poumon, 59037 Lille Cedex France

35 **Contacts:** francois.godart@chru-lille.fr  
36  
37  
38

39 **Patrice Guérin**

40 **Title:** MD, PhD, Professor

41 **Affiliation:** Cardiopédiatrie, CHU Nantes (CHU Nantes, INSERM, Nantes Université, Clinique Cardiologique et des  
42 Maladies Vasculaires, CIC 1413, Institut du Thorax), Nantes, France.

43 **Contacts:** patrice.guerin@chu-nantes.fr  
44  
45  
46  
47

48 **Pauline Helms**

49 **Title:** MD, PhD

50 **Affiliation:** Unit of Cardiopediatrics, University Hospital of Strasbourg, Strasbourg, France

51 **Contacts:** Pauline.helms@chru-strasbourg.fr  
52  
53  
54

55 **Clément Karsenty**

56 **Title:** MD  
57  
58  
59  
60

**Affiliation:** Pediatric and Congenital Cardiology, Children's Hospital and INSERM U1048, I2MC, Institut des Maladies Métaboliques et Cardiovasculaires, Université de Toulouse, France

**Contacts:** clement.karsenty@hotmail.fr

**Bruno Lefort**

**Title:** MD, PhD

**Affiliation:** Institut des Cardiopathies Congénitales, CHRU Tours, 49 boulevard Béranger, 37000 Tours, France

**Contacts:** lefort81@gmail.com

**Pierre Mauran**

**Title:** MD, PhD

**Affiliation:** Unité de cardiologie pédiatrique et congénitale, American Memorial Hospital, CHU de Reims, 47 rue Cognacq-Jay, 51092 Reims Cedex, France

**Contacts:** pmauran@chu-reims.fr

**Caroline Ovaert**

**Title:** MD, PhD, Professor

**Affiliation:** Cardiologie pédiatrique et congénitale, Timone enfants, AP-HM et INSERM 1251, Aix-Marseille Université, Marseille France

**Contacts:** caroline.ovaert@ap-hm.fr

**ORCID:** 0000-0002-2277-2760

**Jean-François Piéchaud**

**Title:** MD, PhD

**Affiliation:** Institut Hospitalier Jacques-Cartier, 91300 Massy, France.

**Contacts:** jfpiechaud@gmail.com

**Jean-Benoît Thambo**

**Title:** MD, PhD, Professor

**Affiliation:** Department of Pediatric and Adult Congenital Cardiology, Bordeaux University Hospital (CHU), 33600 Pessac, France

**Contacts:** jean-benoit.thambo@chu-bordeaux.fr

**Klervi Leuraud**

**Title:** PhD

**Affiliation:** Institute for Radiological Protection and Nuclear Safety (IRSN), PSE-SANTE/SESANE/ Laboratory of Epidemiology BP 17, 92262 Fontenay-aux-Roses, France

**Contacts:** klervi.leuraud@irsn.fr

1  
2  
3 **ORCID:** 0000-0001-5492-168X  
4  
5

6 **Damien Bonnet**

7 **Title:** MD, PhD, Professor

8 **Affiliation:** M3C-Necker, Hôpital universitaire Necker-Enfants malades, Université de Paris, Paris, France

9 **Contacts:** damien.bonnet@nck.ap-hop-paris.fr  
10  
11  
12

13 **Marie-Odile Bernier**

14 **Title:** MD, PhD

15 **Affiliation:** Institute for Radiological Protection and Nuclear Safety (IRSN), PSE-SANTE/SESANE/ Laboratory of  
16 Epidemiology, BP 17, 92262 Fontenay-aux-Roses, France

17 **Contacts:** marie-odile.bernier@irsn.fr

18 **ORCID:** 0000-0001-5807-4596  
19  
20  
21  
22

23 **Estelle Rage**

24 **Title:** PharmD, PhD

25 **Affiliation:** Institute for Radiological Protection and Nuclear Safety (IRSN), PSE-SANTE/SESANE/ Laboratory of  
26 Epidemiology, BP 17, 92262 Fontenay-aux-Roses, France

27 **Contacts:** estelle.rage@irsn.fr

28 **ORCID:** 0000-0002-3251-4124  
29  
30  
31  
32  
33  
34  
35  
36  
37  
38  
39  
40  
41  
42  
43  
44  
45  
46  
47  
48  
49  
50  
51  
52  
53  
54  
55  
56  
57  
58  
59  
60

ew only

## Abstract

**Purpose:** The COCCINELLE study is a nationwide retrospective French cohort set up to evaluate the risk of cancer in patients who undergo cardiac catheterization (CC) procedures for diagnosis or treatment of congenital heart disease (CHD) during childhood.

**Participants:** Children who undergo CC procedures from 01/01/2000 to 31/12/2013, before the age of 16 in one of the 15 pediatric cardiology departments which perform pediatric CC in mainland France were included. The follow-up started at the date of the first recorded CC procedure until the exit date, i.e. the date of death, the date of first cancer diagnosis, the date of the 18<sup>th</sup> birthday, or the 31/12/2015, whichever occurred first. The cohort was linked to the National Childhood Cancer Registry to identify patients diagnosed with cancer and with the French National Directory for the Identification of Natural Persons to retrieve the patients' vital status.

**Findings to date:** A total of 17,104 children were included in the cohort and followed for 110,335 person-years, with 22,227 CC procedures collected. Among the patients, 81.6 % received only one procedure. Fifty-nine cancer cases were observed in the cohort. Standardized Incidence Ratios (SIRs) were increased for all-cancer (SIR = 3.8, 95% confidence interval (CI) 2.9, 4.9), leukemia (SIR = 3.3, 95% CI 2.0, 5.4), lymphoma (SIR = 14.9, 95% CI 9.9, 22.5) and solid cancers excluding central nervous system (CNS) tumors (SIR = 3.3, 95% CI 2.0, 5.5) compared with the general population.

**Future plans:** Dose reconstruction is currently underway to estimate individual cumulative doses absorbed to relevant organs, including red bone marrow and brain for respectively hematologic disorders and CNS tumors risk estimation. A dose-response-analysis will be conducted with consideration to confounding factors such as age at exposure, gender, predisposing factors to cancer and other sources of medical diagnostic low-dose ionizing radiation.

### Strengths and limitations of this study

- The study includes a large national sample of children with congenital heart disease who have undergone cardiac catheterization in France.
- Medical information will be collected from medical records and from the National Health Data System to take into account potential confounding factors such as predisposing conditions to cancer or exposures to other sources of medical diagnostic low-dose ionizing radiation.
- The organ doses due to ionizing radiation will be estimated for each participant.
- Due to the lack of a nationwide cancer registry for adults in France, the cohort will be matched with the National Cancer Institute database built since 2011, to retrieve cancer cases occurring in adulthood in order to assess the association between low-doses ionizing radiation exposure and cancer risk throughout the lifetime of the patient.
- The statistical power of the study is limited due to the small size of the study population in view of the low expected cancer risk, however, the ongoing European HARMONIC project, aiming to pool seven national cohorts (Belgium, France, Italy, Germany, Norway, Spain, and UK) will increase the statistical power of the analyses.

## Introduction

Great improvements have been made in medical diagnostic and treatment tools in the recent decades, and modalities using low-dose ionizing radiation (LDIR) have been extensively used in medical routine practices. Patients with congenital heart defect (CHD) benefit from better quality of life and longer life expectancy due to improvements in cardiac imaging and therapeutic procedures such as cardiac catheterization (CC). A steady increase in the number of cardiac imaging and therapeutic procedures using LDIR has been observed in patients with CHD from the 1990s [1–3]. Radiation doses associated to CC procedures are low-to-moderate compared to conventional radiology procedures. However, in some pediatric patients such as transplanted patients and patients with complex heart defects, CC procedures cumulative radiation doses can exceed 100 millisievert (mSv) [4–6]. Furthermore, CHD pediatric patients undergo various forms of other medical X-ray examinations in relation to their condition, including computed tomography (CT), nuclear medicine, and conventional radiology procedures [3, 5, 7–9]. For these patients, about 60% of the cumulative radiation dose come from interventional procedures such as CC [5] and about 80 to 95% come from both interventional and CT procedures [5, 7, 8].

A 1.6 to 2 times higher prevalence of cancer has been reported in adult patients with CHD compared to the general population [10]. Potential explanations to this higher cancer rate include shared genetic or environmental factors, immunosuppression drugs [11, 12], and exposure to medical LDIR procedures [13]. If ionizing radiation is a well-known risk factor of cancer for moderate to high doses, the risk is still debated for doses under 100 mSv, level of doses that can be reached in case of several CC procedures or in case of association between CC and other diagnostic procedures. However, some epidemiological studies have reported an increased cancer risk for doses lower than 50 mSv with risk decreasing with increasing age at exposure [14–16]. Exposure to medical procedures using LDIR in children is an issue as they have a long life expectancy (therefore more time to develop cancer after exposure to LDIR) and they present a higher sensitivity to LDIR than adults (due to their less mature tissues and organs) [17–19]. Data on cancer risk among children and adults with CHD who have undergone cardiac procedures are scarce and only few studies have been published [11, 12, 20–23]. Some investigators reported increased risk of cancer among CHD pediatric patients diagnosed and or treated with CC [12, 22], while others did not report any significant findings [23]. Common limitations to these previous studies were their small size, lack of precise dose assessment and short duration of follow-up.

1  
2  
3 A nationwide cohort of children and young adults who have undergone diagnostic or therapeutic CC for CHD in  
4 childhood, the COCCINELLE (French acronym for *CO*horte *sur le risque de Cancer après Cardiologie*  
5 *IN*terventionn*ELLE*) cohort has been established in mainland France. The study aims to assess the risk of cancer in  
6  
7 patients with CHD exposed to LDIR during CC procedures. The aim of this study is to describe the cohort and to  
8  
9 analyze the cancer occurrence in this population in comparison to the general population.  
10  
11  
12

### 13 **Cohort description**

#### 14 **Study design**

15  
16  
17  
18  
19 COCCINELLE is a multicenter cohort study on the risk of cancer in patients with CHD who underwent CC  
20  
21 procedures for diagnosis or treatment during childhood [24]. The study received ethical approval from the French  
22  
23 national data protection commission (*Commission Nationale de l'Informatique et des Libertés*). Retrospective data  
24  
25 collection was conducted in fifteen hospitals in France based on medical records of CC examinations performed in  
26  
27 pediatric cardiology departments.  
28  
29

#### 30 **Patient and public involvement**

31  
32  
33 Patients and/or the public were not involved in the design, or conduct, or reporting, or dissemination plans of this  
34  
35 research.  
36  
37

#### 38 **Subject identification and inclusion**

39  
40  
41 The study participants are patients who underwent their first CC for CHD between 1<sup>st</sup> January 2000 and 31<sup>st</sup>  
42  
43 December 2013, who were aged <16 years at the time of the examination, and who have not been diagnosed with  
44  
45 cancer before the first recorded CC procedure.  
46

47  
48 Medical records for 18,906 patients and their 25,139 CC procedures were obtained from pediatric cardiology  
49  
50 departments. Patients for whom the type of procedure could not be identified from medical records (unknown  
51  
52 procedures) and those with unknown gender or those with missing information on dates (birth, death, examination or  
53  
54 cancer diagnosis date) were excluded as those with a diagnosis of cancer before the first CC. Then, 17,104 patients  
55  
56 with 22,227 procedures were included in the cohort (Figure 1).  
57  
58  
59  
60



### Data collection

Collected data from hospitals include the name, the gender, the place and the date of birth, the identification number, the height and the weight of each patient included in the cohort. The characteristics of the CC procedures such as the date, the type of procedure and the technical details including fluoroscopy time and kerma area product ( $P_{KA}$ ) when available were also collected.

At each participating hospital, the history of the angiographic systems used during the study period including the type and the brand of the system, the type and the size (in centimeters (cm)) of the image detector and the fixed X-ray filtration were collected. In addition, detailed dosimetry reports issued from the system at the end of each CC procedure were collected for a sample of patients. The detailed dosimetry reports include information on primary and secondary angulation, field of view (in cm), source-image distance (in cm), and tube potential (in kilovolt (kV)), as well as air kerma and  $P_{KA}$  per acquisition.

In order to assess a potential confounding effect of the patient's health condition, information on underlying diseases or cancer predisposing factors will be retrieved from various sources including the National Health Data System (*Système National des Données de Santé* (SNDS)) or from examination of notes fields in procedures' logbooks.

### Exposure assessment

To assess the possible link between the exposure to LDIR from CC procedures and the subsequent occurrence of cancer, individual doses to specific relevant organs, including red bone marrow and brain for respectively hematologic disorders (leukemia and lymphoma) and central nervous system (CNS) cancer risk estimation, will be estimated. First of all, the CC procedures were grouped into a common classification defined by an expert group of cardiologists (DB, SMM, SH, SC), in order to define families of procedures that are similar. Twelve and three families of procedures were defined respectively for therapeutic and diagnostic procedures (Supplemental material S1). LDIR exposure scenarios will be defined based on available detailed dosimetry reports for each family of procedures, for different patient age group (0-1, 1-5, 5-10, 10-15, and  $\geq 15$  years), and if necessary, for each cardiology department. Based on these exposure scenarios, organ dose computations will be performed with the PCXMC Monte Carlo simulation code (v2.0, STUK, Helsinki, Finland). The organ dose assessment is underway,

1  
2  
3 consequently at this step of the study, only the number of CC procedures will be considered with regard to the cancer  
4 incidence analysis.  
5  
6

### 7 **Follow-up and outcome**

8  
9

10 Follow-up started at the date of the first recorded CC procedure until the exit date i.e. the date of death, the date of  
11 first cancer diagnosis, the date of the 18<sup>th</sup> birthday, or the 31<sup>st</sup> December 2015, whichever occurred first.  
12  
13

14 Vital status and date of death were obtained through linkage with the French National Directory for the Identification  
15 of Natural Persons (RNIPP). Additional information from medical records allowed to complete vital status when the  
16 linkage of the cohort with the RNIPP failed to identify a patient (25% of the cohort), as the large majority of the  
17 patients were closely followed in the cardiology department for their CHD.  
18  
19  
20  
21  
22  
23

24 Matching the COCCINELLE cohort with the National Childhood Cancer Registry (*Registre National des Cancers de*  
25 *l'Enfant* (RNCE)) allowed to identify patients who had been diagnosed with cancer and to obtain the recorded date  
26 of diagnosis and the type of cancer. The RNCE has been registering all cancer cases in children less than 15 years  
27 old in mainland France, since 1990 for hematologic disorders and since 2000 for solid tumors [25]. Since 2011, the  
28 coverage perimeter of the RNCE has been extended to adolescents under the age of 18 and to residents of French  
29 overseas departments. At the time of the linkage, the cancer registry data were available until 31/12/2015.  
30  
31  
32  
33  
34  
35

36 Since the distribution of childhood cancers according to the histological type and location might be very different  
37 from what is observed in adults, cancers cases are described according to the International  
38  
39

40  
41 Classification of Disease – Oncology, third edition (ICDO- 3) and grouped further using the International  
42 Classification of Childhood Cancer – third version (ICCC3) [26]. For patients diagnosed with multiple cancers  
43 during the follow-up, only the first occurring cancer was considered, except for non-melanoma skin cancers.  
44  
45  
46  
47

### 48 **Statistical analysis**

49  
50

51 The cohort characteristics were described as counts, proportions, means (with the standard deviation (SD)) or median  
52 (with the interquartile range (IQR)).  
53  
54  
55  
56  
57  
58  
59  
60

We conducted external comparisons using standardized incidence ratios (SIR) calculated as the ratio of the number of observed cases in the cohort to the number of expected cases based on the national cancer incidence rates provided by the RNCE [25, 27]. The SIRs were standardized by age (0-1, 1-5, 5-10 and 10-15), calendar year (2000-2005, 2005-2010, and 2010-2015), and by gender (male and female). Breslow and Day's approximation [28] was used to estimate 95% confidence intervals (CI) for the SIRs. The SIRs were calculated for five groups of cancer: all-cancer (including all childhood cancer types ICCC3: I - XII), leukemia (ICCC3: Ia, Ib, Id, Ie), lymphoma (ICCC3: IIa-IIc), CNS tumors (ICCC3: IIIb, IIIc, IIIe, IIIf), and solid cancers excluding CNS tumors (ICCC3: IV, VI, VIII - XII).

In order to consider incident cancers possibly associated with CC exposure, we conducted sensitivity analyses in which a minimal exclusion period of two and five years between the first exposure and the cancer onset was applied by excluding respectively, patients who were diagnosed with a cancer within two and five years after the first CC procedure. The SIRs were also computed according to the number of procedure undergone (1, 2, and 3 or more) and a trend test was performed. SIRs analyses were performed in R (R Foundation for Statistical Computing, Vienna, Austria) using the package Epi for the person-years computation and the package popEpi [29]. The statistical significance was defined by  $p < 0.05$ .

## Results

### Characteristics of the study population

The whole cohort consisted of 17,104 subjects, 51% of whom were males. The median duration of follow-up was 5.9 years (IQR 6.4 years), accounting for a total of 110,335 person-years. Children younger than one year at their first CC represented 38.7% of the whole cohort. The median age at exit from the cohort was 10.8 years (IQR 9.3 years). The characteristics of the study patients are described in Table 1.

A total of 22,227 CC procedures were recorded in the cohort (Table 2). The number of procedures received by the patients ranged from 1 to 14; about 82% of the study subjects received only one procedure. Diagnostic procedures represented 8,931 (40.2%) of all procedures performed whereas therapeutic procedures represented 13,296 (59.8 %) (Table 2). Among therapeutic procedures, the most frequent ones were patent ductus arteriosus closure (13.7%), pulmonary valvuloplasty (9.2%), atrial septal defect closure (7.8%), and pulmonary artery dilatation or stenting (5.9%).

## Findings to date

Fifty-nine cancer cases were recorded from 2000 to 2015, among them 34 (57.6%) occurred in males. The median age at cancer diagnosis was 7.4 years (IQR 10.4 years). The cancer types are described in Table 3. The number of procedures per subject was not different between the cancer cases and the non-cancer patients. Thirty-four out of 59 cancers were diagnosed at least two years after the first CC procedures which count 13 (38.2%) lymphomas, 7 (20.6%) leukemia and 14 (41.2%) solid cancers. After a 5-year exclusion period, 15 out of 59 cancer cases were observed with 7 (46.7%) lymphomas, 2 (13.3%) leukemia and 6 (40%) solid cancers.

The results of the analyses comparing cancer incidence in the cohort with that of the general population are presented in Table 4. The SIRs were increased for all-cancer (SIR = 3.8, 95% CI 2.9, 4.9), leukemia (SIR = 3.3, 95% CI 2.0, 5.4), lymphoma (SIR = 14.9, 95% CI 9.9, 22.5) and solid cancers excluding CNS tumors (SIR = 3.3% CI 2.0, 5.5) compared with the general population. In sensitivity analyses, after exclusion of cases diagnosed within the first 2 years after exposure to the first CC examination, SIRs were increased for all-cancer (SIR = 3.4, 95% CI 2.4, 4.7), leukemia (SIR = 2.3, 95% CI 1.1, 4.9), lymphoma (SIR = 10.8, 95% CI 6.3, 18.7) and solid cancers excluding CNS tumors (SIR = 3.4, 95% CI 1.8, 6.5). When considering a 5-year exclusion period, increased SIRs were observed for all-cancer (SIR = 3.3, 95% CI 2.0, 5.4), lymphoma (SIR = 9.5, 95% CI 4.5, 20.0) and solid cancers excluding CNS tumors (SIR = 4.3, 95% CI 1.8, 10.2). SIRs were increased whatever the number of procedure received (1, 2 and 3 or more) with higher SIR for patients receiving 3 or more procedures (SIR = 6.1, 95% CI 3.0, 12.1) compare to those receiving 1 procedure (SIR = 3.7, 95% CI 2.7, 4.9). However, the p-value for trend in SIRs according to the number of procedures undergone (1, 2 and 3 or more) was not statistically significant, p-value = 0.2 (Table 4).

## Discussion

### Main findings

This first analysis of the COCCINELLE cohort shows a higher incidence of all-cancer, leukemia, lymphoma, and other solid cancer (excluding CNS tumors) in the cohort compared to the general population. The SIRs increased non-significantly with the increasing number of procedures received in childhood. In a sensitivity analysis in which all cases occurring during the first 2- and 5-year were excluded, the SIRs remained significantly increased for all-cancer, lymphoma and solid cancer excluding CNS tumors. As about 82% of the cohort received only one procedure,

1  
2  
3 these exclusion periods were used as a surrogate to the latency period, i.e. the minimal delay between exposure and  
4 cancer incidence to be considered.  
5  
6

7  
8 The results from the current study are consistent with the two previous studies that reported increased cancer  
9 incidence following pediatric CC for CHD [12, 22] compared to the general population. Modan et al. [12] observed  
10 a SIR of 2.3 (95% CI 1.2, 4.1) based on the follow-up of 674 children between 1950-1970 in Israel and Harbron et  
11 al.[22] reported higher incidence rates for all-cancer (SIR = 2.32; 95% CI: 1.65, 3.17), lymphoma (SIR = 8.34; 95%  
12 CI 5.22, 12.61), and leukemia (SIR = 2.11; 95% CI 0.82, 4.42) in a cohort of 11,270 children exposed when aged ≤  
13 22 years. On the contrary, a study based on the follow-up of 4,891 children and young adults exposed to CC before  
14 the age of 18 between 1946 and 1968 in Canada did not report any significant increase in cancer incidence, with a  
15 SIR of 1.2 (90% CI 0.6, 2.3) [23]. In adult population, an increased SIR for all-cancer was also reported from a study  
16 on patients who had undergone CC for CHD at adulthood [30].  
17  
18  
19  
20  
21  
22  
23  
24  
25

26 CT and CC procedures both deliver X-ray radiation. Recent studies reported radiation doses delivered by CT ranging  
27 from 8 to 12 milliGray (mGy) to the red bone marrow [31–34], a range of doses consistent to the mean dose of 8.8  
28 mGy to the red bone marrow reported from a recent CC study [22]. As cumulative doses due to CT in childhood are  
29 in the range of those delivered by CC procedures, the estimated SIRs in our cohort can be compared to those from  
30 recently published CT studies [32–35]. Findings from the current study are consistent with results from a nationwide  
31 retrospective cohort of 168,394 children who received one or more CT in Dutch hospitals between 1979 and 2012,  
32 when aged <18 years [36]: the SIRs were 1.47 (95% CI 1.34, 1.61) for all-cancer, 1.39 (95% CI 1.13, 1.70) for  
33 hemato-lymphoproliferative disorders, and 2.05 (95%CI 1.48, 2.83) for CNS tumors after applying a 5-year latency  
34 period. In a German study on 39,184 children younger than 15 years who received CT between 1980 and 2010,  
35 Krille et al. [32, 33] reported significant increased SIRs for all-cancer (SIR = 1.82, 95% CI 1.29, 2.50), and  
36 lymphoma (SIR = 2.96, 95% CI 1.42, 5.45).  
37  
38  
39  
40  
41  
42  
43  
44  
45  
46  
47

48 CHD patients usually require ongoing care to monitor their condition that may result in repeated exposure to LDIR  
49 [3, 5, 7–9] and may lead to high cumulative doses. In the current study, the cumulative number of procedure received  
50 (1, 2 and ≥ 3 procedures) is used as a surrogate to the cumulative individual doses. A significant increased SIR was  
51 observed whatever the number of CC procedures performed, but a slight non-significant positive trend was observed  
52 in the SIRs according to the increasing number of procedures received (SIR = 3.7, 95% CI 2.7, 4.9 for one  
53  
54  
55  
56  
57  
58  
59  
60

1  
2  
3 procedure, SIR = 3.2, 95% CI 1.5, 6.8 for 2 procedures and SIR = 6.1, 95% CI 3.0, 12.1 for  $\geq 3$  procedures; p-value  
4  
5 for trends = 0.2). Cohen et al. used the cumulative number of procedure performed to estimate the risk of cancer after  
6  
7 exposure to LDIR in adult patients and shown that the cumulative number of procedures and the cumulative effective  
8  
9 dose could lead to similar results [30]. In the current study, however, since no dose assessment and no dose-response  
10  
11 analyses are yet available to explain the increased SIRs according to the cumulative number of procedures received,  
12  
13 this result should be interpreted with caution. An individual dose reconstruction is currently underway to estimate the  
14  
15 cumulative organ doses for each of the cohort members, including the contribution of doses from CTs and other  
16  
17 medical diagnostic radiation procedures. A dose-response analysis will then be performed to confirm or not these  
18  
19 first results.  
20

### 21 **Strengths and limitations**

22  
23  
24 The COCCINELLE cohort is the first study in France to assess cancer risk in 17,104 CHD patients who undergone  
25  
26 CC in childhood. The study has access to national well-handled registries which have almost an exhaustive coverage  
27  
28 of the general population. The sample of CHD patient included in the cohort is representative of the pediatric CHD  
29  
30 patients since the major pediatric departments performing CC in mainland France agreed to participate to the study  
31  
32 and contributed actively. However, several limitations should be mentioned.  
33

34  
35  
36 The SIR analyses did not include any information on the dose received during the CC procedures and the results  
37  
38 should be interpreted consequently. Doses estimates are currently underway to provide with accurate dosimetry  
39  
40 data for each patient in the study and cumulative organ doses will be used in the dose response analyses. In  
41  
42 addition, CHD pediatric patients could undergo other diagnostic LDIR procedures such as CT which deliver dose in  
43  
44 the same range as CC, nuclear medicines, and conventional radiographies. The more patients have received CC, the  
45  
46 more they are susceptible to be exposed to other diagnostic medical LDIR. It is important to consider these various  
47  
48 sources of exposure since they can contribute significantly to the overall cumulative organ dose. This additional  
49  
50 information on other medical exposure would be retrieved from the National Health Data System. Further analyses  
51  
52 in the cohort will include doses from CC and other medical diagnosis procedures in the dose-response analyses.  
53  
54  
55  
56  
57  
58  
59  
60

1  
2  
3  
4 The individual dose reconstruction is intended for procedures performed in the cohort, from 2000 to 2013. However  
5  
6 single doses delivered per examination are continuously decreasing due to advances in technologies, protocol  
7  
8 improvements and awareness of cardiologists. Therefore, the dose estimates will not reflect the current dose  
9  
10 reduction practices in cardiology departments and this weakness is inherent to all retrospective epidemiology  
11  
12 studies. Nevertheless, epidemiology studies are still relevant for decision making and radioprotection purposes.  
13  
14  
15

16 Other limitation from the first results of the SIR analyses is the use of the general population as reference group. An  
17  
18 increased risk of cancer in CHD patients compared to the general population has already been reported [13].  
19

20 Common etiologic factors in CHD patients could be suspected [11, 21] as gene mutations in embryogenesis related  
21  
22 to birth defects and cancer development [37]. Post-transplants are also known to present higher rate of cancer due to  
23  
24 the use of immunosuppression drugs [38]. In the UK study on cancer risk after CC in childhood, 509 out of 11,270  
25  
26 individuals had received a transplanted organ with twenty-six malignancies occurring among these transplanted  
27  
28 patients. The authors reported that all of the lymphoma cases observed in the cohort came from transplanted subjects.  
29  
30 Furthermore, censoring these transplant subjects decreased the SIR for all-cancer from 2.32 (95% CI 1.65, 3.17) to  
31  
32 0.90 (95% CI 0.49, 1.49) [22]. Transplantation status and any other cancer predisposing factors are not considered  
33  
34 in the SIRs analysis and the increased SIRs reported in the present study might be confounded with a potential  
35  
36 effect of underlying cancer predisposing factors such as Down syndrome, Noonan syndrome, severe combined  
37  
38 immune deficiency, etc.  
39  
40  
41  
42  
43

44 Indication bias and reverse causation bias can be suspected when cancer predisposing factors or early symptoms of  
45  
46 undetected cancer are the indication of the examination. In the COCCINELLE cohort study, reverse causation bias  
47  
48 can be ruled out as the indication of CC is always the CHD. However, indication bias should be studied since  
49  
50 medical conditions associated with cancer risk predisposition could also be associated with exposure to LDIR  
51  
52 diagnostic procedures. Then, it will be crucial to take into account individual information on cancer risk  
53  
54 predisposition in the ongoing main analyses. Due to the lack of a national registry on transplantation or genetic  
55  
56  
57  
58  
59

1  
2  
3  
4 syndromes in France, the COCCINELLE cohort will use information from the National Health Data System, which  
5  
6 are complete enough to retrieve patients with predisposing factors to cancer [39].  
7  
8

9  
10 The study took into account as much as possible the main factors that could be associated with the studied outcome,  
11  
12 as the genetic or hereditary disorders and immunodeficiency factors associated with cancer. In addition, children  
13  
14 with history of cancer prior to the CC examination were excluded from the cohort to avoid potential effect of  
15  
16 radiotherapy or chemotherapy on a subsequent cancer. However, our study was not designed to directly assess the  
17  
18 effect of factors such as obesity, socio-economic status, lifestyle, and environmental factors in the risk estimate  
19  
20 models since these data could not be retrieved directly from medical record databases. However, major known  
21  
22 factors associated with cancer risks such as smoking and/or alcohol consumption are unlikely to impact the risk  
23  
24 estimates as the studied population includes only children with a follow-up limited to 18 years in this analysis. A  
25  
26 strength of the study is to be able to take into account some other cancer risk factors such as exposure to other  
27  
28 medical diagnostic LDIR such as computed tomography, nuclear medicine, and conventional radiography that will  
29  
30 be retrieved from the National Health Data System.  
31  
32  
33  
34

35  
36 The death rate in the cohort is currently 6.5% for 803 deaths registered in patients for whom this information is  
37  
38 available. Investigators had reported an increased mortality rates among CHD population [40], suggesting that some  
39  
40 subjects might die from the underlying condition (i.e. cardiac dysfunction) before developing cancer. Therefore,  
41  
42 competitive risk should be considered in the ongoing analyses to take into account the risk of death before the  
43  
44 studied outcome, i.e. cancer. This was observed in the French cohort study on CTs, where the early increased  
45  
46 mortality in patients with predisposing factors to cancer leads to decreased risks of radiation associated leukemia and  
47  
48 CNS tumor compared to the increased risk observed in patients without predisposing factors to cancer [31].  
49

50  
51 The number of patients lost to follow-up is currently low in the cohort since children with CHD are closely followed  
52  
53 in cardiology departments involved in this study for the monitoring of their conditions. They can be retrieved from  
54  
55 medical records or from the National Health Data System after 2006; however, we are not able to follow patients,  
56  
57  
58  
59



1  
2  
3 who have emigrated, been diagnosed, or treated outside France borders. The follow-up of our population is currently  
4  
5 limited to the age of 18 years, due to the lack of a nationwide cancer registry for adults. However, the building of a  
6  
7 national cohort of cancer patients since 2011 by the French National Cancer Institute (*Institut National du Cancer*)  
8  
9 based on the National Health Data System will provide a very useful tool to follow the incidence of cancer in our  
10  
11 cohort at adult age [41].  
12

### 13 **Perspectives and collaboration**

14  
15  
16 Overall, the future plans for the cohort analysis include an individual dose reconstruction and the assessment of the  
17  
18 dose-response relationship in regard of the cumulative radiation dose received by each patient. Furthermore,  
19  
20 potential impact of confounding factors such as age at exposure, gender, and attained age will be assessed. The  
21  
22 assessment of potential bias as cancer predisposing factors or additional doses from other medical diagnostic  
23  
24 procedure will be possible thanks to the information retrieved from the National Health Data System. We plan also to  
25  
26 link our cohort with the ongoing national cohort of cancer cases set up by the French National Cancer Institute since  
27  
28 2011, based on data from the National Health Data System [41], which will allow the follow-up of the cohort  
29  
30 patients beyond the age of 18 years old.  
31

32  
33 The number of cancer cases reported in the current study is small, due to a short duration of follow-up and low  
34  
35 cancer incidence rates. A way to overcome this limitation and increase the statistical power of the study is to conduct  
36  
37 combined analyses of several similar studies. The COCCINELLE cohort is contributing to the HARMONIC (for  
38  
39 Health effects of cArdiac fluoRoscropy and MOderN radIotherapy in paediatrICs) project [42] that pools together  
40  
41 seven large national European cohorts (Belgium, France, Italy, Germany, Norway, Spain, and UK), to increase the  
42  
43 statistical power of the analyses. In a few years, HARMONIC will provide information on the risk of cancer  
44  
45 associated with exposure to diagnostic radiation received during childhood with a precision that could not be  
46  
47 achieved with individual national studies.  
48

49  
50 The COCCINELLE study data are not freely available because of ethical and data protection constraints. However,  
51  
52 we welcome inputs from researchers on collaborative projects that will involve the study data. Proposals for possible  
53  
54 collaborations in further analyses of the data should be addressed to Dr Estelle Rage.  
55  
56  
57  
58  
59  
60

### Contributorship statement

MOB, ER, KL lead the project at national level, raised the funding, established the cohort, and provided intellectual inputs to the manuscript. KDA and TF were involved in data analysis, data presentation and drafted the manuscript. SMM, SH, SD, SC and DB contributed to the implementation of the project and to the conception of this article. CD, SDF, SD, FG, PG, PH, CK, BL, PM, CO, JFP and JBT were the local investigators of the project. They contributed to the study design and critically revised the manuscript for important intellectual content. All authors critically revised the manuscript and approved the final version.

### Competing interests

None to declare

### Funding

We gratefully acknowledge the support of *La Ligue contre le cancer* (GB/MA/CD/BC 11264) and of the French National Cancer Institute (INCa) (CFB/SZ-07/06-020).

### Data sharing statement

All data from the COCCINELLE study are deposited at the Laboratory of Epidemiology at French Institute for Radiological Protection and Nuclear Safety (IRSN), BP 17, 92262 Fontenay-aux-Roses, France. The COCCINELLE study data sharing is subject to ethical and data protection constraints. Interested researchers can approach ER principal investigator (estelle.rage@irsn.fr) for sharing COCCINELLE data as part of collaborative research projects (if not overlapping with ongoing research projects, and subject to a Data Use Agreement).

### Ethics approval

The study received ethical approval from the French national data protection commission (*Commission Nationale de l'Informatique et des Libertés*), deliberation N°2016-067 of 13/08/2016.

## References

1. Lucas FL, DeLorenzo MA, Siewers AE, Wennberg DE (2006) Temporal trends in the utilization of diagnostic testing and treatments for cardiovascular disease in the United States, 1993–2001. *Circulation* 113:374–379
2. Yang JC-T, Lin M-T, Jaw F-S, Chen S-J, Wang J-K, Shih TT-F, Wu M-H, Li Y-W (2015) Trends in the utilization of computed tomography and cardiac catheterization among children with congenital heart disease. *Journal of the Formosan Medical Association* 114:1061–1068
3. Beauséjour Ladouceur V, Lawler PR, Gurvitz M, Pilote L, Eisenberg MJ, Ionescu-Ittu R, Guo L, Marelli AJ (2016) Exposure to low-dose ionizing radiation from cardiac procedures in patients with congenital heart disease: 15-year data from a population-based longitudinal cohort. *Circulation* 133:12–20
4. Andreassi Maria Grazia, Picano Eugenio (2014) Reduction of Radiation to Children. *Circulation* 130:135–137 . <https://doi.org/10.1161/CIRCULATIONAHA.114.010699>
5. Johnson JN, Hornik CP, Li JS, Benjamin Jr DK, Yoshizumi TT, Reiman RE, Frush DP, Hill KD (2014) Cumulative radiation exposure and cancer risk estimation in children with heart disease. *Circulation* 130:161–167
6. Onnasch D, Schroder F, Fischer G, Kramer H (2007) Diagnostic reference levels and effective dose in paediatric cardiac catheterization. *The British journal of radiology* 80:177–185
7. Ait-Ali L, Andreassi MG, Foffà I, Spadoni I, Vano E, Picano E (2010) Cumulative patient effective dose and acute radiation-induced chromosomal DNA damage in children with congenital heart disease. *Heart* 96:269–274
8. Glatz AC, Purrington KS, Klinger A, King AR, Hellinger J, Zhu X, Gruber SB, Gruber PJ (2014) Cumulative exposure to medical radiation for children requiring surgery for congenital heart disease. *The Journal of pediatrics* 164:789–794
9. Hill KD, Frush DP, Han BK, Abbott BG, Armstrong AK, DeKemp RA, Glatz AC, Greenberg SB, Herbert AS, Justino H (2017) Radiation safety in children with congenital and acquired heart disease: a scientific position statement on multimodality dose optimization from the image gently alliance. *JACC: Cardiovascular imaging* 10:797–818
10. Gurvitz M, Ionescu-Ittu R, Guo L, Eisenberg MJ, Abrahamowicz M, Pilote L, Marelli AJ (2016) Prevalence of cancer in adults with congenital heart disease compared with the general population. *The American journal of cardiology* 118:1742–1750
11. Lee Y-S, Chen Y-T, Jeng M-J, Tsao P-C, Yen H-J, Lee P-C, Li S-Y, Liu C-J, Chen T-J, Chou P (2015) The risk of cancer in patients with congenital heart disease: a nationwide population-based cohort study in Taiwan. *PLoS One* 10:e0116844 . <https://doi.org/https://doi.org/10.1371/journal.pone.0116844>
12. Modan B, Keinan L, Blumstein T, Sadetzki S (2000) Cancer following cardiac catheterization in childhood. *International journal of epidemiology* 29:424–428
13. Cohen S, Gurvitz MZ, Beauséjour-Ladouceur V, Lawler PR, Therrien J, Marelli AJ (2019) Cancer Risk in Congenital Heart Disease—What is The Evidence? *Canadian Journal of Cardiology* 35:1750–1761 . <https://doi.org/https://doi.org/10.1016/j.cjca.2019.09.023>
14. Little MP (2009) Cancer and non-cancer effects in Japanese atomic bomb survivors. *Journal of Radiological Protection* 29:A43

15. Little MP (2008) Leukaemia following childhood radiation exposure in the Japanese atomic bomb survivors and in medically exposed groups. *Radiation Protection Dosimetry* 132:156–165 .  
<https://doi.org/10.1093/rpd/ncn264>
16. Little MP, Wakeford R, Borrego D, French B, Zablotska LB, Adams MJ, Allodji R, de Vathaire F, Lee C, Brenner AV (2018) Leukaemia and myeloid malignancy among people exposed to low doses (< 100 mSv) of ionising radiation during childhood: a pooled analysis of nine historical cohort studies. *The Lancet Haematology* 5:e346–e358
17. Fazel R, Krumholz HM, Wang Y, Ross JS, Chen J, Ting HH, Shah ND, Nasir K, Einstein AJ, Nallamothu BK (2009) Exposure to low-dose ionizing radiation from medical imaging procedures. *New England Journal of Medicine* 361:849–857
18. UNSCEAR: United Nations Scientific Committee on the Effects of Atomic Radiation (2013) Sources, Effects and Risks of Ionizing Radiation. Volume II. Scientific Annex B: Effects of Radiation Exposure of Children. United Nations, New York
19. Van Cleave J, Gortmaker SL, Perrin JM (2010) Dynamics of obesity and chronic health conditions among children and youth. *Journal of the American Medical Association* 303:623–630
20. Bjørge T, Cnattingius S, Lie RT, Tretli S, Engeland A (2008) Cancer risk in children with birth defects and in their families: a population based cohort study of 5.2 million children from Norway and Sweden. *Cancer Epidemiology and Prevention Biomarkers* 17:500–506
21. Fisher PG, Reynolds P, Von Behren J, Carmichael SL, Rasmussen SA, Shaw GM (2012) Cancer in children with nonchromosomal birth defects. *The Journal of pediatrics* 160:978–983
22. Harbron RW, Chapple C-L, O’Sullivan JJ, Lee C, McHugh K, Higuera M, Pearce MS (2018) Cancer incidence among children and young adults who have undergone x-ray guided cardiac catheterization procedures. *European Journal of Epidemiology* 33:393–401 . <https://doi.org/10.1007/s10654-018-0357-0>
23. McLaughlin JR, Kreiger N, Sloan MP, Benson LN, Hilditch S, Clarke EA (1993) An historical cohort study of cardiac catheterization during childhood and the risk of cancer. *International journal of epidemiology* 22:584–591
24. Baysson H, Nkoumazok B, Barnaoui S, Réhel J, Girodon B, Milani G, Boudjemline Y, Bonnet D, Laurier D, Bernier M (2015) Follow-up of children exposed to ionising radiation from cardiac catheterisation: the Coccinelle study. *Radiation protection dosimetry* 165:13–16
25. Lacour B, Guyot-Goubin A, Guissou S, Bellec S, Désandes E, Clavel J (2010) Incidence of childhood cancer in France: national children cancer registries, 2000–2004. *European Journal of Cancer Prevention* 19:173–181
26. Steliarova-Foucher E, Stiller C, Lacour B, Kaatsch P (2005) International classification of childhood cancer. *Cancer* 103:1457–1467
27. Taux d’incidence de 2010 à 2014, par groupe diagnostique et par tranche d’âge - RNCE.  
<https://rnce.inserm.fr/index.php/fr/statistiques/statistiques-d-incidence/taux-d-incidence-de-2010-a-2014-par-groupe-diagnostique-et-par-tranche-d-age>. Accessed 28 Jan 2020
28. Breslow NE, Day NE (1987) *Statistical Methods in Cancer Research Volume II: The Design and Analysis of Cohort Studies*, IARC Scientific Publication. IARC Scientific Publication No. 82, Lyon, France: International Agency for Research on Cancer.
29. Miettinen J, Rantanen M, Seppa K (2019) popEpi: Functions for Epidemiological Analysis using Population Data. R package version 0.4.8. <https://CRAN.R-project.org/package=popEpi>

- 1
- 2
- 3 30. Cohen S, Liu A, Gurvitz M, Guo L, Therrien J, Laprise C, Kaufman JS, Abrahamowicz M, Marelli AJ (2018) Exposure to low-dose ionizing radiation from cardiac procedures and malignancy risk in adults with congenital heart disease. *Circulation* 137:1334–1345
- 4
- 5
- 6
- 7 31. Journy N, Roué T, Cardis E, Le Pointe HD, Brisse H, Chateil J, Laurier D, Bernier M (2016) Childhood CT scans and cancer risk: impact of predisposing factors for cancer on the risk estimates. *Journal of Radiological Protection* 36:N1
- 8
- 9
- 10
- 11 32. Krille L, Dreger S, Schindel R, Albrecht T, Asmussen M, Barkhausen J, Berthold J, Chavan A, Claussen C, Forsting M (2015) Risk of cancer incidence before the age of 15 years after exposure to ionising radiation from computed tomography: results from a German cohort study. *Radiation and environmental biophysics* 54:1–12
- 12
- 13
- 14
- 15
- 16 33. Krille L, Dreger S, Schindel R, Albrecht T, Asmussen M, Barkhausen J, Berthold J, Chavan A, Claussen C, Forsting M (2017) Erratum to: risk of cancer incidence before the age of 15 years after exposure to ionising radiation from computed tomography: results from a German cohort study. *Radiation and environmental biophysics* 56:293–297
- 17
- 18
- 19
- 20
- 21 34. Meulepas JM, Ronckers CM, Smets AMJB, Nievelstein RAJ, Gradowska P, Lee C, Jahnen A, van Straten M, de Wit M-CY, Zonnenberg B, Klein WM, Merks JH, Visser O, van Leeuwen FE, Hauptmann M (2018) Radiation Exposure From Pediatric CT Scans and Subsequent Cancer Risk in the Netherlands. *JNCI: Journal of the National Cancer Institute* 111:256–263 . <https://doi.org/10.1093/jnci/djy104>
- 22
- 23
- 24
- 25 35. Abalo KD, Rage E, Leuraud K, Richardson DB, Le Pointe HD, Laurier D, Bernier M-O (2020) Early life ionizing radiation exposure and cancer risks: systematic review and meta-analysis. *Pediatric radiology* 1–12
- 26
- 27
- 28 36. Meulepas JM, Ronckers CM, Smets AMJB, Nievelstein RAJ, Gradowska P, Lee C, Jahnen A, van Straten M, de Wit M-CY, Zonnenberg B, Klein WM, Merks JH, Visser O, van Leeuwen FE, Hauptmann M (2018) Radiation Exposure From Pediatric CT Scans and Subsequent Cancer Risk in the Netherlands. *JNCI: Journal of the National Cancer Institute* 111:256–263 . <https://doi.org/10.1093/jnci/djy104>
- 29
- 30
- 31
- 32
- 33 37. Narod SA, Hawkins MM, Robertson CM, Stiller CA (1997) Congenital anomalies and childhood cancer in Great Britain. *American journal of human genetics* 60:474
- 34
- 35
- 36 38. Grulich AE, Van Leeuwen MT, Falster MO, Vajdic CM (2007) Incidence of cancers in people with HIV/AIDS compared with immunosuppressed transplant recipients: a meta-analysis. *The Lancet* 370:59–67
- 37
- 38
- 39 39. Bernier M, Mezzarobba M, Maupu E, Caër-Lorho S, Brisse H, Laurier D, Brunelle F, Chatellier G (2012) Role of French hospital claims databases from care units in epidemiological studies: the example of the " Cohorte Enfant Scanner" study. *Revue d'épidémiologie et de sante publique* 60:363–370
- 40
- 41
- 42
- 43 40. Meberg A, Otterstad J, Frøland G, Lindberg H, Sørland S (2000) Outcome of congenital heart defects—a population-based study. *Acta Paediatrica* 89:1344–1351 . <https://doi.org/10.1111/j.1651-2227.2000.tb00763.x>
- 44
- 45
- 46 41. Bousquet PJ, Lefeuvre D, Tuppin P, BenDiane MK, Rocchi M, Bouee-Benhamiche E, Viguier J, Le Bihan-Benjamin C (2018) Cancer care and public health policy evaluations in France: usefulness of the national cancer cohort. *PloS one* 13:e0206448 . <https://doi.org/https://doi.org/10.1371/journal.pone.0206448>
- 47
- 48
- 49 42. Harmonic. In: Harmonic. <https://harmonicproject.eu/>. Accessed 20 Dec 2020
- 50
- 51
- 52
- 53
- 54
- 55
- 56
- 57
- 58
- 59
- 60

## Acknowledgments

We gratefully thank all the staff members of the participating centers for their contribution to this project, in particular we warmly thank Pr Jérôme Petit (Cardiology department, Hôpital Marie Lannelongue, Le Plessis Robinson), Dr Hélène Bouvaist, Dr Isabelle Pin, Dr Julia Rousseau and Mrs Caroline Tournegros (Cardiopédiatrie, hôpital couple enfant, CHU Grenoble Alpes), Dr Nadir Benbrik, Dr Bénédicte Romefort, Dr Laurianne Le Gloan and Dr Karine Warin Fresse (CHU Nantes, Clinique Cardiologique et des Maladies Vasculaires, Nantes), Dr Zakaria Jalal and Dr Xavier Iriart (Department of Paediatric and Adult Congenital Cardiology, Bordeaux University Hospital (CHU), Pessac), Dr Julie Haesebaert (Hospices Civils de Lyon, Pôle de Santé Publique – Service de Recherche et d'Epidémiologie Cliniques, Lyon), Pr Alain Chantepie (Institut des Cardiopathies Congénitales, CHRU Tours), Dr Ivan Bouzguenda (Institut Hospitalier Jacques-Cartier, Massy), Dr Céline Gronier (Institut cardiovasculaire de Strasbourg - Clinique Rhena), Mrs Brigitte Girodon (M3C-Necker, Hôpital universitaire Necker-Enfants malades), Pr Philippe Acar (Pediatric and Congenital Cardiology, Children's Hospital, University of Toulouse), Pr Jean-René Lusson, Mr Pierre-Emmanuel Dine, Mr Joël Guersen and Mr Florian Magnier (Pôle Imagerie Diagnostique et Radiologie Interventionnelle, CHU Clermont Ferrand), Dr Ali Houejeh and Mr Jean-Benoît Baudalet (Service de Cardiologie Infantile et Congénitale, Institut Cœur Poumon, Lille), Dr Angelo Livolsi, Dr Selim Saad (Unit of Cardiopediatrics, University Hospital of Strasbourg, Strasbourg), Mrs Christiane Leleu (Unité de cardiologie pédiatrique et congénitale, American Memorial Hospital, CHU de Reims). This report makes use of data obtained from the French national childhood cancer registry and we acknowledge Dr Brigitte Lacour for her help and her support. This work had received funding from La Ligue contre le cancer (GB/MA/CD/BC 11264) and the French National Cancer Institute (INCa) (CFB/SZ-07/06-020).

Table 1: Description of the COCCINELLE cohort, 2000-2015

|                                                         | Patients with cancer<br>N=59 | Patients without cancer<br>N=17,045 |
|---------------------------------------------------------|------------------------------|-------------------------------------|
| <b>Demographics</b>                                     |                              |                                     |
| Male, N (%)                                             | 34 (57.6)                    | 8,702 (51.1)                        |
| Median age (in year) at first procedure (IQR)           | 2.6 (9.9)                    | 2.2 (7.4)                           |
| Median age (in year) at exit (IQR)                      | 7.4 (10.4)                   | 10.9 (9.3)                          |
| <b>Age at first procedure, N (%)</b>                    |                              |                                     |
| < 1 year                                                | 24 (40.7)                    | 6,589 (38.7)                        |
| 1 – 5 years                                             | 12 (20.3)                    | 4,206 (24.7)                        |
| 5 – 10 years                                            | 8 (13.6)                     | 3,216 (18.9)                        |
| 10 – 15 years                                           | 15 (25.4)                    | 3,034 (17.8)                        |
| <b>Birth period, N (%)</b>                              |                              |                                     |
| [1980, 1990]                                            | 2 (3.4)                      | 484 (2.8)                           |
| ]1990, 2000]                                            | 20 (33.9)                    | 4,273 (25.1)                        |
| ]2000, 2010]                                            | 31 (52.5)                    | 9,511 (55.8)                        |
| ]2010, 2013]                                            | 6 (10.2)                     | 2,777 (16.3)                        |
| <b>Number of procedures received by children, N (%)</b> |                              |                                     |
| 1 procedure                                             | 44 (74.6)                    | 13,929 (81.7)                       |
| 2 procedures                                            | 7 (11.9)                     | 2,021 (11.9)                        |
| ≥ 3 procedures                                          | 8 (13.6)                     | 1,095 (6.4)                         |

*IQR: Interquartile range*

Table 2: Description of the cardiac catheterization procedures received in the COCCINELLE cohort

|                                                                     | <b>Total</b> | <b>(%)</b> |
|---------------------------------------------------------------------|--------------|------------|
| <b>Category of procedures</b>                                       |              |            |
| Therapeutic                                                         | 13,296       | 59,8       |
| Diagnostic                                                          | 8,931        | 40.2       |
| Total                                                               | 22,227       | 100        |
| <b>Most frequent families of procedures</b>                         |              |            |
| Diagnostic cardiac catheterization without angiography <sup>d</sup> | 3,868        | 17.4       |
| Patent ductus arteriosus closure                                    | 3,046        | 13.7       |
| Pulmonary valvuloplasty                                             | 2,052        | 9.2        |
| Atrial septal defect closure                                        | 1,741        | 7.8        |
| Right and left heart angiography <sup>d</sup>                       | 1,466        | 6.6        |
| Left heart angiography <sup>d</sup>                                 | 1,313        | 5.9        |
| Pulmonary artery dilatation or stenting                             | 1,310        | 5.9        |
| Atrial septostomy                                                   | 1,208        | 5.4        |
| Electrophysiology procedures                                        | 1,165        | 5.2        |
| Right heart angiography <sup>d</sup>                                | 1,066        | 4.8        |
| Other procedures                                                    | 3,992        | 17.9       |

*d: Diagnostic procedures*



Table 3: Description of the cancers that occurred in the COCCINELLE cohort from 2000 - 2015

| Cancer type                                                              | All period<br>N (%) | After a 2-year<br>exclusion*<br>N (%) | After a 5-year<br>exclusion*<br>N (%) |
|--------------------------------------------------------------------------|---------------------|---------------------------------------|---------------------------------------|
| Leukemia<br>ICCC3: Ia, Ib, Id, Ie                                        | 15 (25.4)           | 7 (20.6)                              | 2 (13.3)                              |
| Lymphoma<br>ICCC3: IIa-IIc                                               | 23 (39.0)           | 13 (38.2)                             | 7 (46.7)                              |
| Central nervous system<br>ICCC3: IIIb, IIIc, IIIe, IIIf                  | 6 (10.2)            | 5 (14.7)                              | 1 (6.7)                               |
| Neuroblastoma and other peripheral<br>nervous cell tumors ICC3: IVa, IVb | 1 (1.7)             | 1 (2.9)                               | 1 (6.7)                               |
| Renal tumors<br>ICCC3: VIa, VIb                                          | 4 (6.8)             | 3 (8.8)                               | -                                     |
| Malignant bone tumors<br>ICCC3: VIII                                     | 1 (1.7)             | -                                     | -                                     |
| Soft tissue and other extra osseous<br>sarcomas ICC3: IXb, IXe           | 4 (6.8)             | 2 (5.9)                               | 2 (13.3)                              |
| Germ cell tumors<br>ICCC3: X                                             | 2 (3.4)             | 1 (2.9)                               | -                                     |
| Other malignant epithelial neoplasms<br>ICCC3: XI                        | 2 (3.4)             | 1 (2.9)                               | 1 (6.7)                               |
| Other and unspecified malignant<br>neoplasms ICC3: XII                   | 1 (1.7)             | 1 (2.9)                               | 1 (6.7)                               |
| <b>All-cancer</b>                                                        | <b>59 (100)</b>     | <b>34 (100)</b>                       | <b>15 (100)</b>                       |

ICCC3: *International Classification of Childhood Cancer – third version (ICCC3) [25]*

\* : 2- and 5-year exclusion: *Exclusion of all -cancer cases diagnosed respectively within 2 or 5 years after the first CC procedure.*

Table 4: Standardized incidence ratio (SIR) for cancers in the COCCINELLE cohort

|                                                                               | All-period      |                  | After a 2-year exclusion* |                  | After a 5-year exclusion* |                  |
|-------------------------------------------------------------------------------|-----------------|------------------|---------------------------|------------------|---------------------------|------------------|
|                                                                               | Number of cases | SIR (95% CI)     | Number of cases           | SIR (95% CI)     | Number of cases           | SIR (95% CI)     |
| <b>Type of cancer</b>                                                         |                 |                  |                           |                  |                           |                  |
| All-cancer                                                                    | 59              | 3.8 (2.9; 4.9)   | 34                        | 3.4 (2.4; 4.7)   | 15                        | 3.3 (2.0; 5.4)   |
| Leukemia                                                                      | 15              | 3.3 (2.0; 5.4)   | 7                         | 2.3 (1.1; 4.9)   | 2                         | 1.6 (0.4; 6.6)   |
| Lymphoma                                                                      | 23              | 14.9 (9.9; 22.5) | 13                        | 10.8 (6.3; 18.7) | 7                         | 9.5 (4.5; 20.0)  |
| CNS                                                                           | 6               | 1.5 (0.7; 3.4)   | 5                         | 1.9 (0.8; 4.5)   | 1                         | 0.8 (0.1; 5.5)   |
| Solid cancer**                                                                | 15              | 3.3 (2.0; 5.5)   | 9                         | 3.4 (1.8; 6.5)   | 5                         | 4.3 (1.8; 10.2)  |
| <b>By gender: Male</b>                                                        |                 |                  |                           |                  |                           |                  |
| All-cancer                                                                    | 34              | 3.9 (2.8; 5.5)   | 21                        | 3.7 (2.4; 5.7)   | 7                         | 2.7 (1.3; 5.6)   |
| Leukemia                                                                      | 9               | 3.5 (1.8; 6.7)   | 7                         | 4.1 (1.9; 8.5)   | 2                         | 2.8 (0.7; 11.1)  |
| Lymphoma                                                                      | 16              | 15.3 (9.4; 25.0) | 10                        | 12.3 (6.6; 22.9) | 4                         | 8.2 (3.1; 21.7)  |
| CNS                                                                           | 4               | 1.8 (0.7; 4.9)   | 3                         | 2.0 (0.6; 6.2)   | -                         | -                |
| Solid cancer**                                                                | 5               | 2.2 (0.9; 5.2)   | 1                         | 0.7 (0.1; 5.2)   | 1                         | 1.7 (0.2; 12.2)  |
| <b>By gender: Female</b>                                                      |                 |                  |                           |                  |                           |                  |
| All-cancer                                                                    | 25              | 3.6 (2.5; 5.4)   | 13                        | 3.0 (1.7; 5.1)   | 8                         | 4.1 (2.0; 8.1)   |
| Leukemia                                                                      | 6               | 3.0 (1.4; 6.7)   | -                         | -                | -                         | -                |
| Lymphoma                                                                      | 7               | 14.2 (6.8; 29.7) | 3                         | 7.8 (2.5; 24.1)  | 3                         | 12.2 (3.9; 37.9) |
| CNS                                                                           | 2               | 1.1 (0.3; 4.5)   | 2                         | 1.7 (0.4; 6.7)   | 1                         | 1.8 (0.3; 12.6)  |
| Solid cancer**                                                                | 10              | 4.6 (2.5; 8.5)   | 8                         | 6.1 (3.1; 12.2)  | 4                         | 6.7 (2.5; 17.9)  |
| <b>By age group (all-cancer)</b>                                              |                 |                  |                           |                  |                           |                  |
| < 1 year                                                                      | 1               | 0.9 (0.0; 4.8)   | -                         | -                | -                         | -                |
| 1 – 5 years                                                                   | 23              | 3.7 (2.3; 5.5)   | 13                        | 3.9 (2.1; 6.7)   | -                         | -                |
| 5 – 10 years                                                                  | 12              | 2.7 (1.4; 4.6)   | 8                         | 2.1 (0.9; 4.2)   | 6                         | 2.4 (0.9; 5.3)   |
| 10 – 15 years                                                                 | 14              | 3.9 (2.1; 6.5)   | 8                         | 2.7 (1.2; 5.3)   | 6                         | 2.8 (1.0; 6.2)   |
| <b>By calendar period (all-cancer)</b>                                        |                 |                  |                           |                  |                           |                  |
| 2000 - 2005                                                                   | 8               | 4.2 (2.1; 8.4)   | 1                         | 1.6 (0.2; 11.6)  | -                         | -                |
| 2005 - 2010                                                                   | 23              | 4.3 (2.9; 6.5)   | 13                        | 3.9 (2.3; 6.7)   | 5                         | 4.5 (1.9; 10.9)  |
| 2010 - 2015                                                                   | 28              | 3.4 (2.3; 4.9)   | 20                        | 3.3 (2.1; 5.1)   | 10                        | 2.9 (1.6; 5.4)   |
| <b>Number of the cardiac catheterization procedures received (all-cancer)</b> |                 |                  |                           |                  |                           |                  |
| 1                                                                             | 44              | 3.7 (2.7; 4.9)   | 24                        | 3.1 (2.1; 4.7)   | 7                         | 2.1 (1; 4.3)     |

1  
2  
3  
4  
5  
6  
7  
8  
9  
10  
11  
12  
13  
14  
15  
16  
17  
18  
19  
20  
21  
22  
23  
24  
25  
26  
27  
28  
29  
30  
31  
32  
33  
34  
35  
36  
37  
38  
39  
40  
41  
42  
43  
44  
45  
46  
47  
48  
49  
50  
51  
52  
53  
54  
55  
56  
57  
58  
59  
60

|                    |   |                 |   |                 |   |                 |
|--------------------|---|-----------------|---|-----------------|---|-----------------|
| 2                  | 7 | 3.2 (1.5; 6.8)  | 5 | 3.4 (1.4; 8.2)  | 4 | 5.7 (2.1; 15.2) |
| 3 or more          | 8 | 6.1 (3.0; 12.1) | 5 | 5.5 (2.3; 13.1) | 4 | 8.8 (3.3; 23.3) |
| <i>p-value</i> *** |   | 0.2             |   | 0.2             |   | < 0.01          |

*CNS: Central nervous system tumors*

*SIR: Standardized Incidence Ratio*

*95% CI: 95% Confidence Interval*

*\*: 2- and 5-year exclusion: Exclusion of all -cancer cases diagnosed respectively within 2 or 5 years after the first CC procedure*

*\*\* : Solid cancer excluding central nervous system tumors*

*\*\*\*: p-value for trends.*

For peer review only

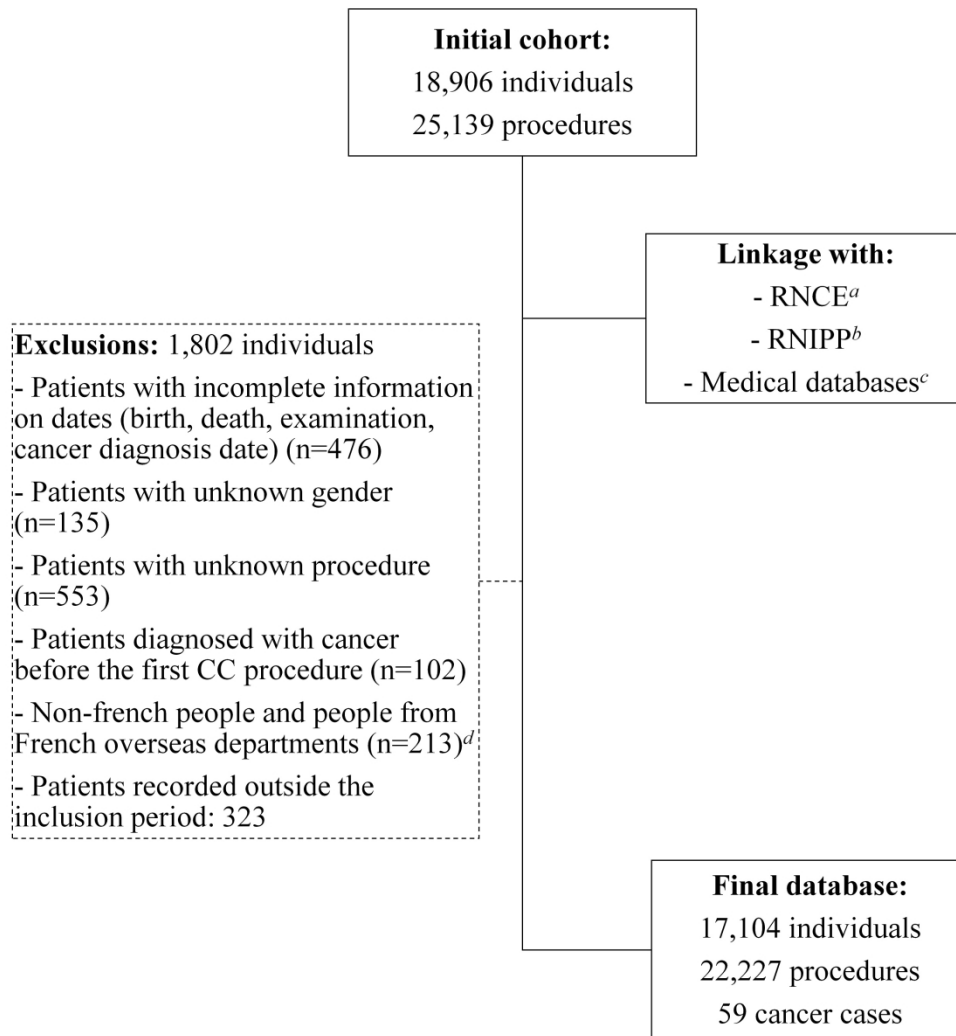

41  
42  
43  
44  
45  
46  
47  
48  
49  
50  
51  
52  
53  
54  
55  
56  
57  
58  
59  
60

Figure 1: Flow chart of the COCCINELLE cohort constitution: a: RNCE: French National Childhood Cancer Registry (Registre National des Cancers de l'Enfant) b: RNIPP: French National Directory for the Identification of Natural Persons c: Medical discharge and reimbursement databases d: French overseas departments not covered by the RNCE before 2011 CC: Cardiac catheterization

109x118mm (600 x 600 DPI)

## Supplemental material

S1: Category and family classification of cardiac catheterization procedures in the COCCINELLE cohort

| Category of procedures                                                                   | Family of procedures                                                  | Names of the procedures                                                    |
|------------------------------------------------------------------------------------------|-----------------------------------------------------------------------|----------------------------------------------------------------------------|
| Diagnostic procedures                                                                    | Right heart angiography                                               | - Catheterization right with contrast                                      |
|                                                                                          | Diagnostic procedures without angiography                             | - Catheterization right without contrast                                   |
|                                                                                          |                                                                       | - Catheterization left without contrast                                    |
|                                                                                          |                                                                       | - Catheterization left and right without contrast                          |
| Left heart angiography                                                                   | Pulmonary arterial hypertension                                       | - Biopsy endo-myocardial                                                   |
|                                                                                          |                                                                       | - Pulmonary arterial hypertension with normal heart                        |
|                                                                                          |                                                                       | - Pulmonary arterial hypertension shunt (Eisenmenger)                      |
|                                                                                          | - Catheterization left with contrast                                  |                                                                            |
| Therapeutic procedures                                                                   | Pulmonary valvuloplasty                                               | - Pulmonary valve dilatation                                               |
|                                                                                          |                                                                       | - Pulmonary atresia intact ventricular septum, radiofrequency, perforation |
|                                                                                          |                                                                       | - Perforation pulmonary valve                                              |
|                                                                                          | Aortic valvuloplasty                                                  | - Aortic valve dilatation                                                  |
|                                                                                          | Rashkind                                                              | - Atrial septostomy                                                        |
|                                                                                          | Aortic dilatation / stenting                                          | - Balloon dilatation of coarctation of the aorta                           |
| - Stenting of aortic coarctation                                                         |                                                                       |                                                                            |
| Pulmonary artery dilatation / stenting                                                   | - Balloon dilatation of pulmonary artery: unique / multiple           |                                                                            |
|                                                                                          | - Balloon dilatation of pulmonary artery                              |                                                                            |
|                                                                                          | - Balloon dilatation of right ventricle - pulmonary artery conduit    |                                                                            |
|                                                                                          | - Balloon dilatation of homograft                                     |                                                                            |
|                                                                                          | - Balloon dilatation of pulmonary artery banding                      |                                                                            |
|                                                                                          | - Stenting of pulmonary artery branch: unique stent / multiple stents |                                                                            |
|                                                                                          | - Stenting of pulmonary artery trunk: unique stent / multiple stents  |                                                                            |
| - Stenting of right ventricle - pulmonary artery conduit: unique stent / multiple stents |                                                                       |                                                                            |
| - Percutaneous pulmonary valve implantation                                              |                                                                       |                                                                            |
| - Patent ductus arteriosus dilatation                                                    |                                                                       |                                                                            |

|    |                                         |                                                               |
|----|-----------------------------------------|---------------------------------------------------------------|
| 1  |                                         |                                                               |
| 2  |                                         |                                                               |
| 3  | Various angiography                     | - Balloon dilatation of superior vena cava                    |
| 4  |                                         | - Superior vena cava stenting                                 |
| 5  |                                         | - Balloon dilatation of inferior vena cava                    |
| 6  |                                         | - Inferior vena cava stenting                                 |
| 7  |                                         | - Balloon dilatation of pulmonary vena                        |
| 8  |                                         | - Pulmonary vein stenting: unique / multiple                  |
| 9  |                                         | - Balloon dilatation of coronary artery                       |
| 10 |                                         | - Stenting Coronary: unique / multiple                        |
| 11 |                                         | - Patent ductus arteriosus stent (non-neotal)                 |
| 12 |                                         | - Major aortopulmonary collateral arteries: unique/ multiples |
| 13 |                                         | - Balloon dilatation of Blalock                               |
| 14 |                                         | - Stenting Blalock: unique/ multiples                         |
| 15 |                                         | - Thrombo-aspiration, Vertical vein closure, Occlusion        |
| 16 |                                         | femoral artery, stenting iliac artery, Stenting subclavian    |
| 17 |                                         | artery.                                                       |
| 18 |                                         | - Percutaneous removal of a foreign body                      |
| 19 |                                         | - Arterio-venous fistula embolization: unique/ multiples      |
| 20 |                                         | - Blalock embolization                                        |
| 21 |                                         | - Fenestration closure                                        |
| 22 |                                         | - Sequestration closure: unique / multiple                    |
| 23 |                                         | - Coronary fistula closure: unique / multiple                 |
| 24 |                                         | - Aorto-pulmonary collaterals embolization: unique /          |
| 25 |                                         | multiple                                                      |
| 26 |                                         |                                                               |
| 27 | Complex neonatal procedures             | - Hybrid procedures                                           |
| 28 |                                         | - Patent ductus arteriosus stenting                           |
| 29 |                                         | - Atrial septal defect creation                               |
| 30 |                                         | - Atrial septal defect stenting                               |
| 31 |                                         |                                                               |
| 32 | Atrial septal defect closure            | - Atrial septal defect closure                                |
| 33 |                                         | - Patent foramen ovale                                        |
| 34 |                                         |                                                               |
| 35 | Ventricular Septal Defect (VSD) closure | - Ventricular septal defect closure                           |
| 36 |                                         |                                                               |
| 37 |                                         |                                                               |
| 38 | Arterial duct closure                   | - Patent ductus arteriosus closure: coil / plug               |
| 39 |                                         |                                                               |
| 40 | Rythmology: stimulation                 | - Pacemaker                                                   |
| 41 |                                         | - Defibrilators                                               |
| 42 |                                         | - Pacing                                                      |
| 43 | Rythmology: electrophysiology           | - Electrophysiology, Flutter, Kent                            |
| 44 |                                         |                                                               |
| 45 | Other procedures                        | Other unclassified procedures                                 |
| 46 |                                         | - Catheterization left and right with contrast                |
| 47 |                                         | - Biopsy and coronarography                                   |
| 48 |                                         | - Tricuspid dilatation                                        |
| 49 |                                         | - Mitral valve dilatation                                     |
| 50 |                                         | - Aorto-pulmonary window (aorto-pulmonary septal defect)      |
| 51 |                                         |                                                               |
| 52 |                                         |                                                               |
| 53 |                                         |                                                               |
| 54 |                                         |                                                               |
| 55 |                                         |                                                               |
| 56 |                                         |                                                               |
| 57 |                                         |                                                               |
| 58 |                                         |                                                               |
| 59 |                                         |                                                               |
| 60 |                                         |                                                               |
