# Supplementary material for: Exposure to low-dose ionising radiation from cardiac catheterisation and risk of cancer: the COCCINELLE study cohort profile
Source: PubMed Central journal article supplement — BMJ Open. 2021 Aug 3;11(8):e048576. doi: 10.1136/bmjopen-2020-048576 (PMC8336117; doi:10.1136/bmjopen-2020-048576), 2021-08-03
Supplement: bmjopen-2020-048576supp001.pdf [file bmjopen-2020-048576supp001.pdf]

## Supplemental material

S1: Category and family classification of cardiac catheterization procedures in the COCCINELLE cohort

| Category of procedures | Family of procedures                      | Names of the procedures                                                                                                                                                                                                                                                                                                                                                                                                                                                                                                                                                                                     |
|------------------------|-------------------------------------------|-------------------------------------------------------------------------------------------------------------------------------------------------------------------------------------------------------------------------------------------------------------------------------------------------------------------------------------------------------------------------------------------------------------------------------------------------------------------------------------------------------------------------------------------------------------------------------------------------------------|
| Diagnostic procedures  | Right heart angiography                   | - Catheterization right with contrast                                                                                                                                                                                                                                                                                                                                                                                                                                                                                                                                                                       |
|                        | Diagnostic procedures without angiography | - Catheterization right without contrast<br>- Catheterization left without contrast<br>- Catheterization left and right without contrast<br>- Biopsy endo-myocardial<br><br>Pulmonary arterial hypertension<br>- Pulmonary arterial hypertension with normal heart<br>- Pulmonary arterial hypertension shunt (Eisenmenger)                                                                                                                                                                                                                                                                                 |
|                        | Left heart angiography                    | - Catheterization left with contrast                                                                                                                                                                                                                                                                                                                                                                                                                                                                                                                                                                        |
| Therapeutic procedures | Pulmonary valvuloplasty                   | - Pulmonary valve dilatation<br>- Pulmonary atresia intact ventricular septum, radiofrequency, perforation<br>- Perforation pulmonary valve                                                                                                                                                                                                                                                                                                                                                                                                                                                                 |
|                        | Aortic valvuloplasty                      | - Aortic valve dilatation                                                                                                                                                                                                                                                                                                                                                                                                                                                                                                                                                                                   |
|                        | Rashkind                                  | - Atrial septostomy                                                                                                                                                                                                                                                                                                                                                                                                                                                                                                                                                                                         |
|                        | Aortic dilatation / stenting              | - Balloon dilatation of coarctation of the aorta<br>- Stenting of aortic coarctation                                                                                                                                                                                                                                                                                                                                                                                                                                                                                                                        |
|                        | Pulmonary artery dilatation / stenting    | - Balloon dilatation of pulmonary artery: unique / multiple<br>- Balloon dilatation of pulmonary artery<br>- Balloon dilatation of right ventricle - pulmonary artery conduit<br>- Balloon dilatation of homograft<br>- Balloon dilatation of pulmonary artery banding<br>- Stenting of pulmonary artery branch: unique stent / multiple stents<br>- Stenting of pulmonary artery trunk: unique stent / multiple stents<br>- Stenting of right ventricle - pulmonary artery conduit: unique stent / multiple stents<br>- Percutaneous pulmonary valve implantation<br>- Patent ductus arteriosus dilatation |

|                  |                                         |                                                                                                                                                                                                                                                                                                                                                                                                                                                                                                                                                                                                                                                                                                                                                                                                                                                                                                                                                                                                                                                                                                                                                                      |
|------------------|-----------------------------------------|----------------------------------------------------------------------------------------------------------------------------------------------------------------------------------------------------------------------------------------------------------------------------------------------------------------------------------------------------------------------------------------------------------------------------------------------------------------------------------------------------------------------------------------------------------------------------------------------------------------------------------------------------------------------------------------------------------------------------------------------------------------------------------------------------------------------------------------------------------------------------------------------------------------------------------------------------------------------------------------------------------------------------------------------------------------------------------------------------------------------------------------------------------------------|
|                  | Various angiography                     | <ul style="list-style-type: none"> <li>- Balloon dilatation of superior vena cava</li> <li>- Superior vena cava stenting</li> <li>- Balloon dilatation of inferior vena cava</li> <li>- Inferior vena cava stenting</li> <li>- Balloon dilatation of pulmonary vena</li> <li>- Pulmonary vein stenting: unique / multiple</li> <li>- Balloon dilatation of coronary artery</li> <li>- Stenting Coronary: unique / multiple</li> <li>- Patent ductus arteriosus stent (non-neotal)</li> <li>- Major aortopulmonary collateral arteries: unique/ multiples</li> <li>- Balloon dilatation of Blalock</li> <li>- Stenting Blalock: unique/ multiples</li> <li>- Thrombo-aspiration, Vertical vein closure, Occlusion femoral artery, stenting iliac artery, Stenting subclavian artery.</li> <li>- Percutaneous removal of a foreign body</li> <li>- Arterio-venous fistula embolization: unique/ multiples</li> <li>- Blalock embolization</li> <li>- Fenestration closure</li> <li>- Sequestration closure: unique / multiple</li> <li>- Coronary fistula closure: unique / multiple</li> <li>- Aorto-pulmonary collaterals embolization: unique / multiple</li> </ul> |
|                  | Complex neonatal procedures             | <ul style="list-style-type: none"> <li>- Hybrid procedures</li> <li>- Patent ductus arteriosus stenting</li> <li>- Atrial septal defect creation</li> <li>- Atrial septal defect stenting</li> </ul>                                                                                                                                                                                                                                                                                                                                                                                                                                                                                                                                                                                                                                                                                                                                                                                                                                                                                                                                                                 |
|                  | Atrial septal defect closure            | <ul style="list-style-type: none"> <li>- Atrial septal defect closure</li> <li>- Patent foramen ovale</li> </ul>                                                                                                                                                                                                                                                                                                                                                                                                                                                                                                                                                                                                                                                                                                                                                                                                                                                                                                                                                                                                                                                     |
|                  | Ventricular Septal Defect (VSD) closure | <ul style="list-style-type: none"> <li>- Ventricular septal defect closure</li> </ul>                                                                                                                                                                                                                                                                                                                                                                                                                                                                                                                                                                                                                                                                                                                                                                                                                                                                                                                                                                                                                                                                                |
|                  | Arterial duct closure                   | <ul style="list-style-type: none"> <li>- Patent ductus arteriosus closure: coil / plug</li> </ul>                                                                                                                                                                                                                                                                                                                                                                                                                                                                                                                                                                                                                                                                                                                                                                                                                                                                                                                                                                                                                                                                    |
|                  | Rythmology: stimulation                 | <ul style="list-style-type: none"> <li>- Pacemaker</li> <li>- Defibrilators</li> <li>- Pacing</li> </ul>                                                                                                                                                                                                                                                                                                                                                                                                                                                                                                                                                                                                                                                                                                                                                                                                                                                                                                                                                                                                                                                             |
|                  | Rythmology: electrophysiology           | <ul style="list-style-type: none"> <li>- Electrophysiology, Flutter, Kent</li> </ul>                                                                                                                                                                                                                                                                                                                                                                                                                                                                                                                                                                                                                                                                                                                                                                                                                                                                                                                                                                                                                                                                                 |
| Other procedures | Other unclassified procedures           | <ul style="list-style-type: none"> <li>- Catheterization left and right with contrast</li> <li>- Biopsy and coronarography</li> <li>- Tricuspid dilatation</li> <li>- Mitral valve dilatation</li> <li>- Aorto-pulmonary window (aorto-pulmonary septal defect)</li> </ul>                                                                                                                                                                                                                                                                                                                                                                                                                                                                                                                                                                                                                                                                                                                                                                                                                                                                                           |
